# Supplementary material for: An Evaluation of Blood Compatibility of Silver Nanoparticles
Source: PubMed Central journal article supplement (PMC4857076; doi:10.1038/srep25518), 2016-05-05
Supplement: srep25518-s1.pdf [file srep25518-s1.pdf]

# Supplementary Information

## An Evaluation of Blood Compatibility of Silver Nanoparticles

He Huang<sup>1,†</sup>, Wenjia Lai<sup>2,†</sup>, Menghua Cui<sup>1</sup>, Ling Liang<sup>1,3</sup>, Yuchen Lin<sup>2</sup>, Qiaojun Fang<sup>2,\*</sup>, Ying Liu<sup>2,\*</sup>, Liming Xie<sup>1</sup>

<sup>1</sup> Key Laboratory of Standardization and Measurement for Nanotechnology of Chinese Academy of Sciences, CAS Center for Excellence in Nanoscience, National Center for Nanoscience and Technology, Beijing 100190, P. R. China.

<sup>2</sup> Key Laboratory for Biomedical Effects of Nanomaterials and Nanosafety of Chinese Academy of Sciences, CAS Center for Excellence in Nanoscience, National Center for Nanoscience and Technology, Beijing 100190, P. R. China.

<sup>3</sup> College of Chemistry and Chemical Engineering, Lanzhou University, Lanzhou, 730000, P. R. China.

<sup>†</sup> Contributed equally to this work.

\*Corresponding author: Qiaojun Fang, Tel: +86-10-82545562, Fax: +86-10-82545643, E-mail: [fangqj@nanoctr.cn](mailto:fangqj@nanoctr.cn); Ying Liu, Tel: +86-010-82545665, E-mail: [liuy1@nanoctr.cn](mailto:liuy1@nanoctr.cn).

Figure S1: Lymphocyte proliferation after citrate and Ag ion treatment

Figure S2: Effect of AgNPs at high concentrations on platelet aggregation and coagulation

Figure S3: The full-length gel images of qualitative analysis of total complement activation by Western blotting

Figure S4: Protein coronas and their compositions of AgNPs

Figure S5: Correlations of label-free quantification intensities depicting the reproducibility across two biological replicates of AgNPs corona proteomes

Figure S6: Relative plasma protein concentrations and protein concentrations

Figure S7: Relative pI and MW of plasma proteins and corona proteins

Table S1: List of plasma proteins on AgNPs corona

Table S2: Correlation analysis of corona proteins' pI and MW with their label-free quantification intensities.

Table S3: All enriched GO biological processes for identified corona proteins

A

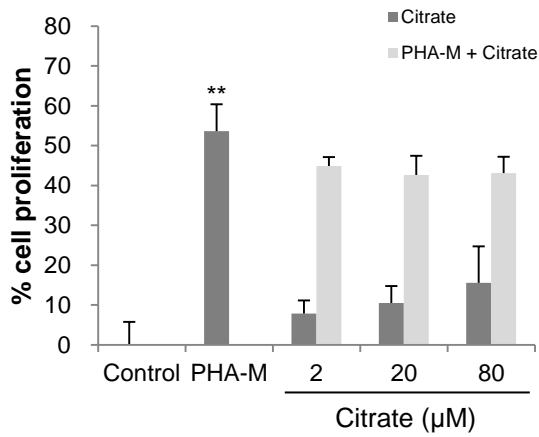

B

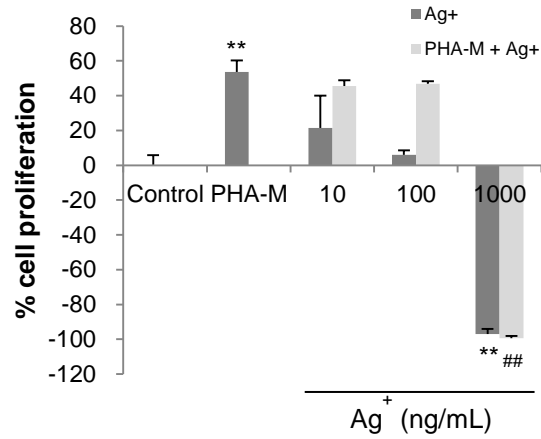

Figure S1. Lymphocyte proliferation after citrate and Ag ion treatment. PBMCs were treated with different concentrations of citrate (A) or Ag ion (B) for 3 days, and then measured by MTS assay. RPMI-1640 and PHA-M were used as negative control and positive control, respectively. \*\* $p < 0.01$ , significantly different from negative control. # $p < 0.05$ , ## $p < 0.01$ , significantly different from positive control.

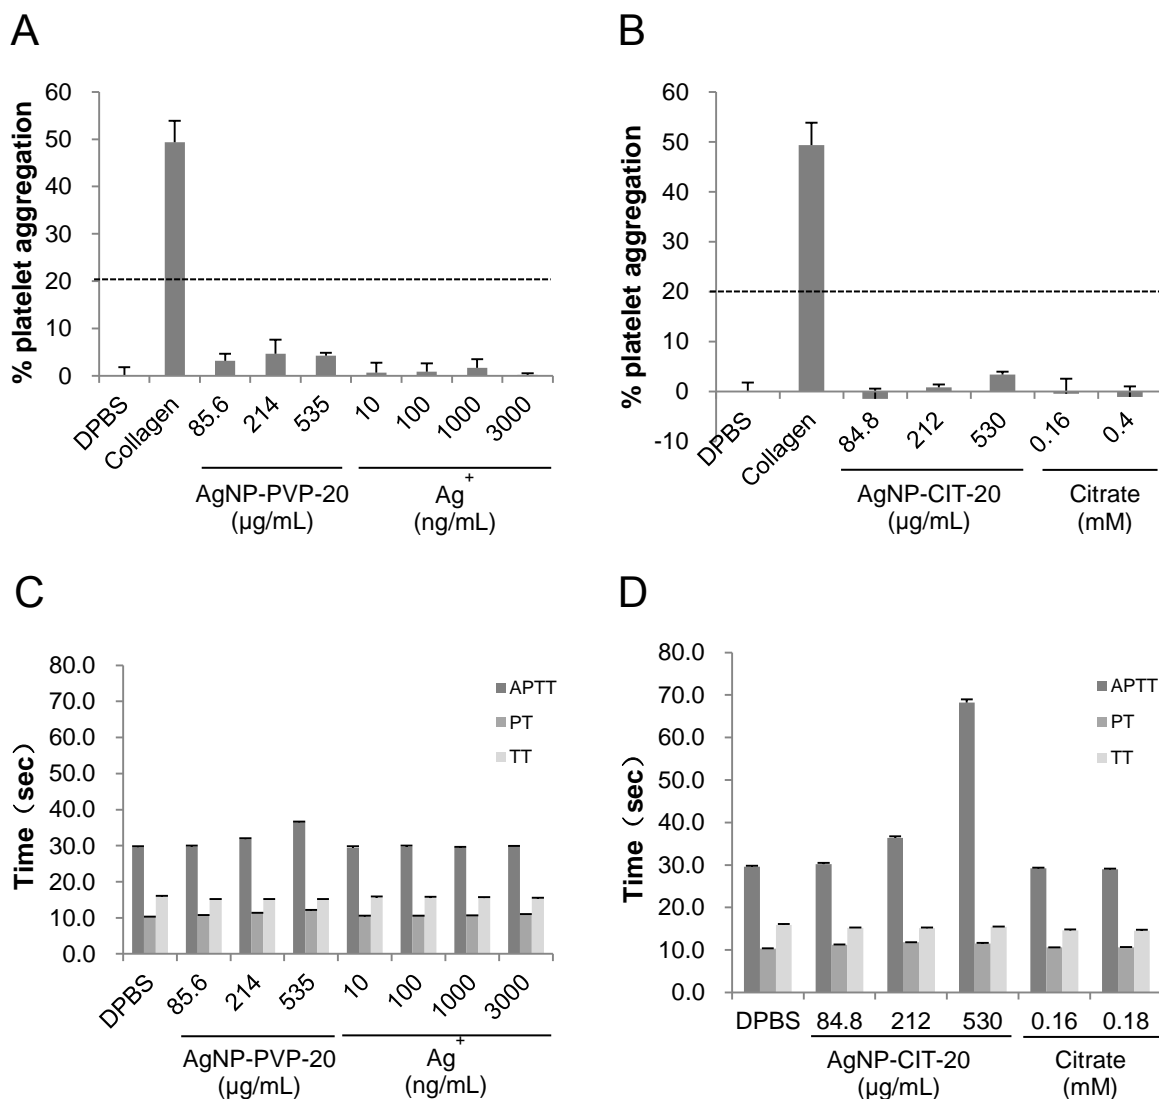

Figure S2. Effect of AgNPs at high concentrations on platelet aggregation and coagulation. Platelet aggregation was measured by incubating PRP with AgNP-PVP-20 (A) or AgNP-CIT-20 (B) for 15 min.  $1 \times$  DPBS and 1.0 mg/mL collagen were used as negative control and positive control, respectively. 20% of platelet aggregation was defined as the assay threshold (dash line). In the coagulation assay, APTT, PT and TT were separately tested after exposure PPP to AgNP-PVP-20 (C) and AgNP-CIT-20 (D) for 30 min. In addition, different concentrations of  $\text{AgNO}_3$  as well as citrate were also included.

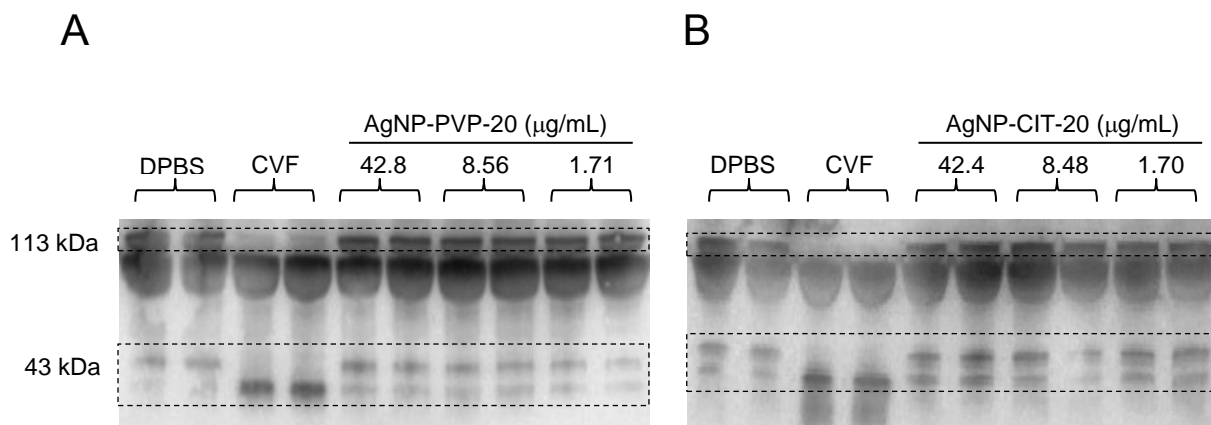

Figure S3. The full-length gel images of qualitative analysis of total complement activation by Western blotting. The expression levels of C3- $\alpha$  chain (115 kDa) and cleavage products (~40 kDa) were determined by Western blotting analysis after exposure to human normal plasma to indicated concentrations of AgNPs for 30 min at 37°C.  $1 \times$  DPBS and CVF were used as negative control and positive control, respectively. The representative full-length immunoblotting images of AgNP-PVP-20 (A) and AgNP-CIT-20 (B) were presented.

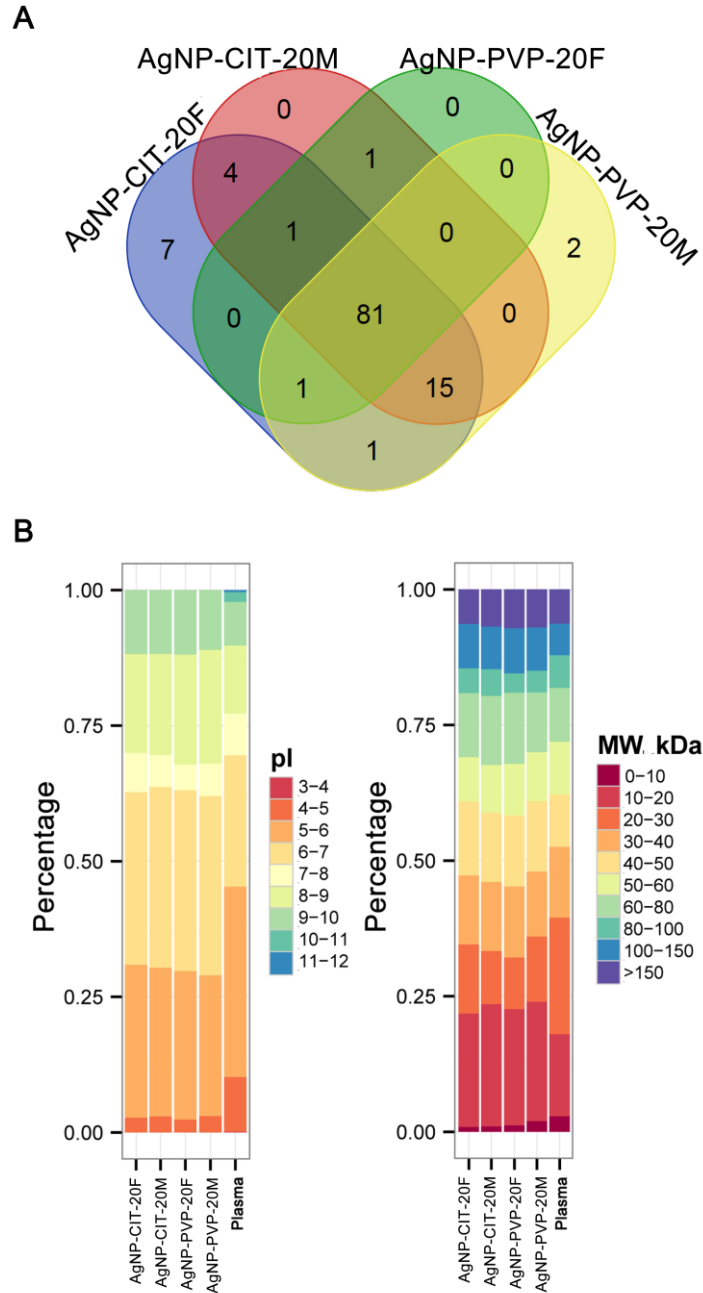

Figure S4. Protein coronas and their compositions of AgNPs. (A) Overlaps of proteins identifications from citrate or PVP coated AgNPs incubated with female or male plasma by label-free quantification. Numbers of proteins identified in both biological replicates of each approach were shown. Classification of plasma proteins and corona proteins identified on citrate or PVP coated AgNPs by LC-MS according to the MW (B) and pI (C).

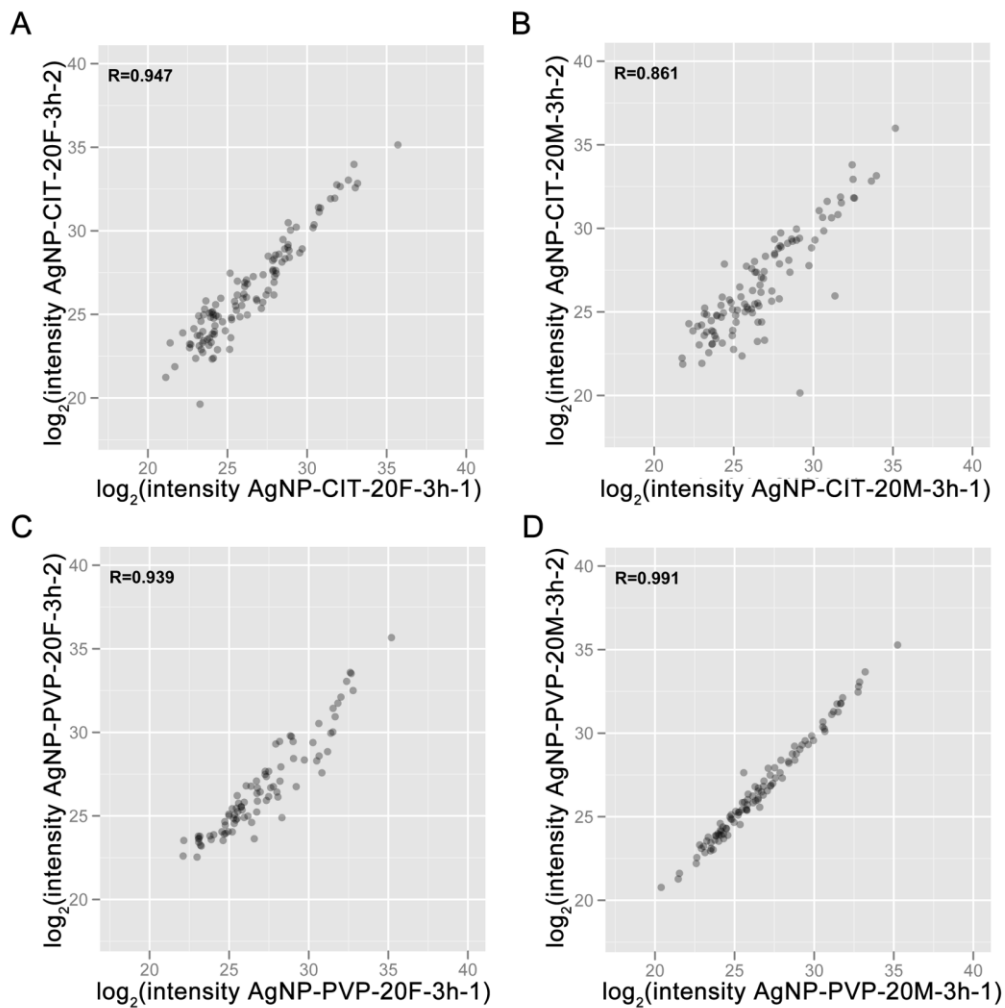

Figure S5. Correlations of label-free quantification intensities depicting the reproducibility across two biological replicates of AgNPs corona proteomes. (A) AgNP-CIT-20F, (B) AgNP-CIT-20M, (C) AgNP-PVP-20F and (D) AgNP-PVP-20M.

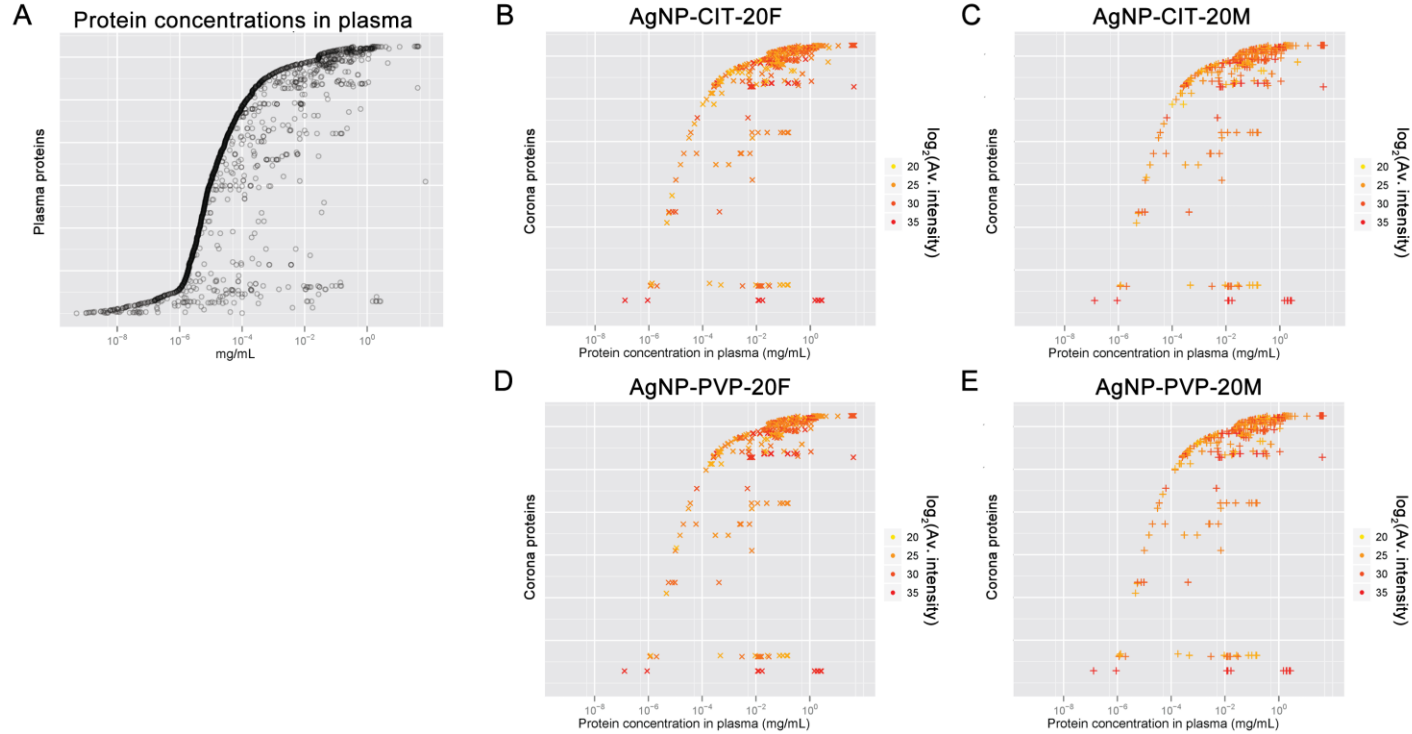

Figure S6. Relative plasma protein concentrations (A) and protein concentrations as well as intensities of corona proteins identified in four experiments by LC-MS and their label-free quantification. (B) AgNP coated with citrate using female plasma sample, (C) AgNP coated with citrate using male plasma sample (D) AgNP coated with PVP using female plasma sample and (E) AgNP coated with PVP using male plasma sample. Y axis represents different proteins and x axis is different concentrations observed for each protein. As in Plasma Proteome Database (PPD), one protein usually has several concentrations. Intensities in log<sub>2</sub> scales are divided in four different categories as indicated by different colors (red for 35, orange for 30, dark yellow for 30 and bright yellow for 25).



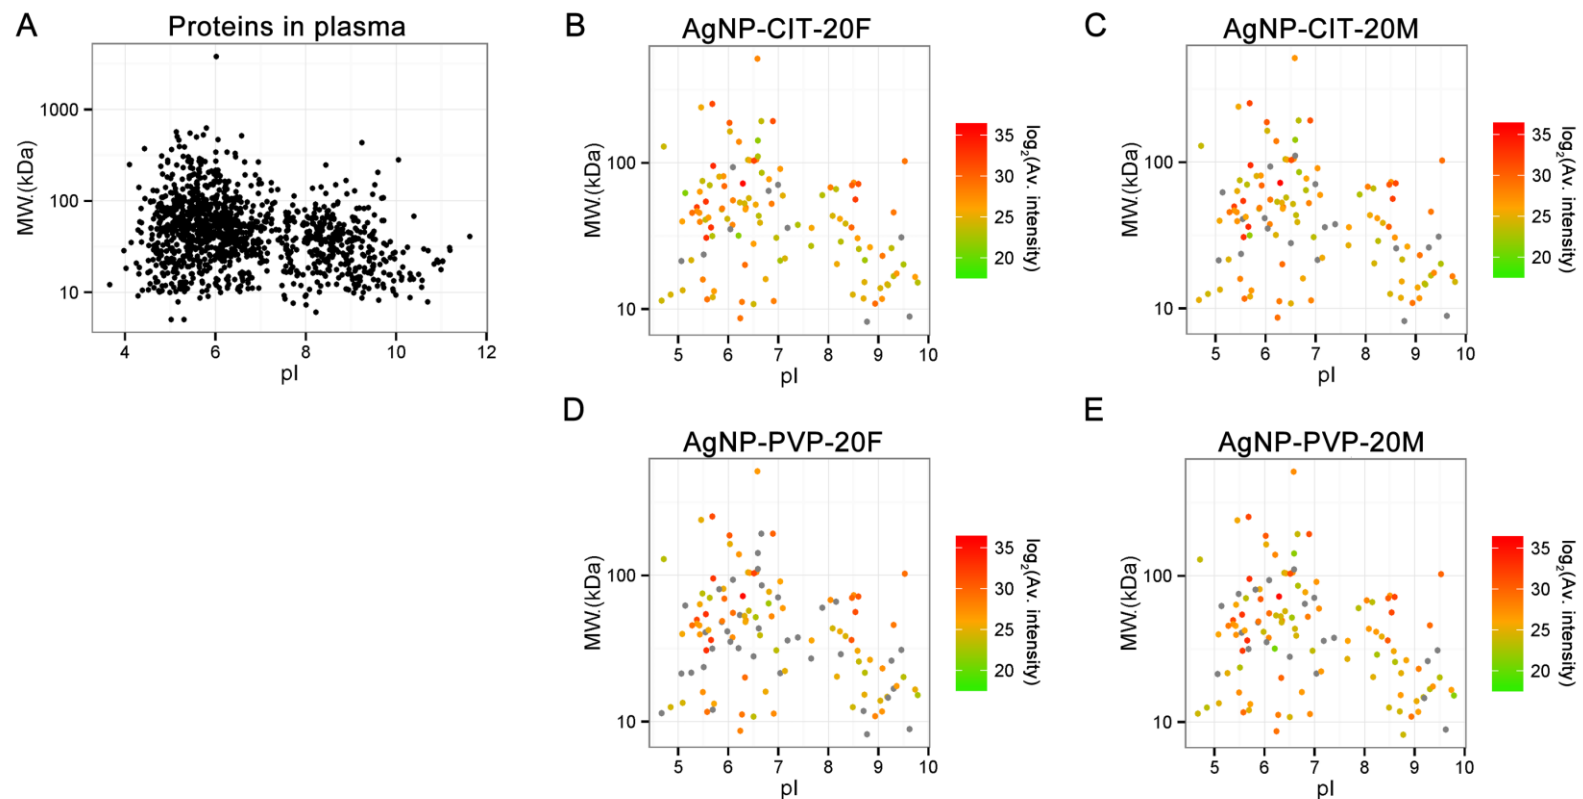

Figure S7. Relative pI and MW of plasma proteins (A) and corona proteins identified in (B) AgNP-CIT-20F, (C) AgNP-CIT-20M, (D) AgNP-PVP-20F and (E) AgNP-PVP-20M experiments with their label-free quantification intensities colored in green to red gradient showing low to high intensity accordingly.

Table S1. List of plasma proteins on AgNPs corona identified by LC-MS, including log<sub>2</sub> transformed average (Av.) intensity on label free quantitative proteomics

| Uniprot ID | log <sub>2</sub> Av. (intensity AgNP-CIT-20F-3h) | log <sub>2</sub> Av. (intensity AgNP-CIT-20M-3h) | log <sub>2</sub> Av. (intensity AgNP-PVP-20F-3h) | log <sub>2</sub> Av. (intensity AgNP-PVP-20M-3h) | log <sub>2</sub> Av. (intensity blank) | Mol. weight [kDa] | Isoelectric Point (pI) | Gene names | Protein names                                       |
|------------|--------------------------------------------------|--------------------------------------------------|--------------------------------------------------|--------------------------------------------------|----------------------------------------|-------------------|------------------------|------------|-----------------------------------------------------|
| B7ZKJ8     | 25.611                                           | 25.559                                           | 26.435                                           | 25.243                                           |                                        | 103.880           | 6.430                  | ITIH4      | 35 kDa inter-alpha-trypsin inhibitor heavy chain H4 |
| P00568     | 22.344                                           | 23.943                                           | 23.221                                           | 24.940                                           |                                        | 21.635            | 8.730                  | AK1        | Adenylate kinase isoenzyme 1                        |
| P01009     | 27.305                                           | 26.822                                           | 26.634                                           | 26.993                                           |                                        | 46.736            | 5.370                  | SERPINA1   | Alpha-1-antitrypsin                                 |
| P08697-2   | 23.625                                           | 24.029                                           |                                                  |                                                  |                                        | 47.906            | 5.870                  | SERPINF2   | Alpha-2-antiplasmin                                 |
| P02765     | 27.720                                           | 26.904                                           | 26.547                                           | 27.083                                           |                                        | 39.324            | 5.430                  | AHSG       | Alpha-2-HS-glycoprotein                             |
| P01023     | 24.615                                           | 24.246                                           | 25.092                                           | 25.195                                           |                                        | 163.290           | 6.030                  | A2M        | Alpha-2-macroglobulin                               |
| P37840-2   | 23.987                                           | 25.082                                           |                                                  | 24.001                                           |                                        | 11.372            | 4.670                  | SNCA       | Alpha-synuclein                                     |
| P03950     | 26.372                                           | 28.429                                           | 25.106                                           | 26.299                                           |                                        | 16.550            | 9.730                  | ANG        | Angiogenin                                          |
| P01008     | 24.266                                           | 25.121                                           | 24.935                                           | 24.327                                           |                                        | 52.602            | 6.320                  | SERPINC1   | Antithrombin-III                                    |
| P02647     | 33.006                                           | 33.120                                           | 33.097                                           | 32.608                                           | 30.833                                 | 30.777            | 5.560                  | APOA1      | Apolipoprotein A-I                                  |
| P02652     | 28.646                                           | 28.439                                           | 28.813                                           | 28.307                                           |                                        | 11.175            | 6.270                  | APOA2      | Apolipoprotein A-II                                 |
| P06727     | 29.110                                           | 28.839                                           | 29.318                                           | 28.585                                           |                                        | 45.398            | 5.280                  | APOA4      | Apolipoprotein A-IV                                 |
| Q6Q788     | 24.074                                           |                                                  |                                                  | 23.843                                           |                                        | 41.212            | 5.980                  | APOA5      | Apolipoprotein A-V                                  |
| P04114     | 27.755                                           | 26.932                                           | 26.692                                           | 27.443                                           |                                        | 515.600           | 6.580                  | APOB       | Apolipoprotein B-100                                |
| P02654     | 28.983                                           | 29.114                                           | 28.092                                           | 29.067                                           |                                        | 9.332             | 8.010                  | APOC1      | Apolipoprotein C-I                                  |
| P02655     | 29.305                                           | 29.449                                           | 29.335                                           | 29.759                                           |                                        | 11.284            | 4.640                  | APOC2      | Apolipoprotein C-II                                 |
| P55056     | 24.020                                           | 23.150                                           |                                                  |                                                  |                                        | 14.553            | 9.190                  | APOC4      | Apolipoprotein C-IV                                 |
| P02649     | 32.803                                           | 33.554                                           | 32.716                                           | 33.434                                           |                                        | 36.154            | 5.650                  | APOE       | Apolipoprotein E                                    |
| O14791-3   | 26.472                                           | 25.934                                           | 25.512                                           | 26.001                                           |                                        | 42.158            | 5.600                  | APOL1      | Apolipoprotein L1                                   |
| Q9BXN1     | 23.371                                           | 23.643                                           |                                                  | 24.134                                           |                                        | 43.417            | 6.610                  | ASPN       | Asporin                                             |
| P02749     | 24.236                                           | 24.958                                           | 24.604                                           | 25.161                                           |                                        | 38.298            | 8.340                  | APOH       | Beta-2-glycoprotein 1                               |
| H3BV17     | 27.038                                           | 27.162                                           | 26.330                                           | 26.138                                           |                                        | 45.520            | 5.420                  | CDH1       | Cadherin-1                                          |
| P15169     | 28.474                                           | 27.989                                           | 27.637                                           | 28.339                                           |                                        | 52.286            | 6.860                  | CPN1       | Carboxypeptidase N catalytic chain                  |
| P10909-4   | 28.421                                           | 28.275                                           | 28.617                                           | 28.824                                           |                                        | 48.803            | 5.880                  | CLU        | Clusterin                                           |
| P12259     | 31.697                                           | 31.791                                           | 31.482                                           | 31.737                                           |                                        | 251.700           | 5.680                  | F5         | Coagulation factor V                                |
| P03951     | 30.276                                           | 30.712                                           | 29.826                                           | 30.388                                           |                                        | 70.108            | 8.470                  | F11        | Coagulation factor XI                               |
| P00748     | 28.276                                           | 28.295                                           | 27.266                                           | 27.725                                           |                                        | 67.791            | 8.040                  | F12        | Coagulation factor XII                              |
| Q9Y6Z7     | 23.517                                           | 23.346                                           | 23.384                                           | 23.563                                           |                                        | 30.705            | 6.960                  | COLEC10    | Collectin-10                                        |
| Q9BWP8-8   | 24.475                                           | 24.649                                           |                                                  | 24.953                                           |                                        | 21.589            | 5.260                  | COLEC11    | Collectin-11                                        |
| P02745     | 23.493                                           |                                                  |                                                  |                                                  |                                        | 26.016            | 9.260                  | C1QA       | Complement C1q subcomponent subunit A               |
| P02746     | 25.966                                           | 25.895                                           | 25.676                                           | 25.741                                           |                                        | 26.722            | 8.830                  | C1QB       | Complement C1q subcomponent subunit B               |
| P02747     | 23.464                                           |                                                  | 23.797                                           | 22.997                                           |                                        | 25.773            | 8.610                  | C1QC       | Complement C1q subcomponent subunit C               |

| Uniprot ID | log <sub>2</sub> Av.<br>(intensity<br>AgNP-CIT-<br>20F-3h) | log <sub>2</sub> Av.<br>(intensity<br>AgNP-CIT-<br>20M-3h) | log <sub>2</sub> Av.<br>(intensity<br>AgNP-PVP-<br>20F-3h) | log <sub>2</sub> Av.<br>(intensity<br>AgNP-PVP-<br>20M-3h) | log <sub>2</sub> Av.<br>(intensity<br>blank) | Mol.<br>weight<br>[kDa] | Isoelectric<br>Point (pI) | Gene<br>names | Protein names                         |
|------------|------------------------------------------------------------|------------------------------------------------------------|------------------------------------------------------------|------------------------------------------------------------|----------------------------------------------|-------------------------|---------------------------|---------------|---------------------------------------|
| P00736     | 24.971                                                     | 24.795                                                     |                                                            |                                                            |                                              | 80.118                  | 5.820                     | C1R           | Complement C1r subcomponent           |
| P01024     | 30.401                                                     | 30.619                                                     | 30.581                                                     | 30.613                                                     |                                              | 187.150                 | 6.020                     | C3            | Complement C3                         |
| P0C0L4     | 23.650                                                     | 23.375                                                     |                                                            | 23.850                                                     |                                              | 192.780                 | 6.660                     | C4A           | Complement C4-A                       |
| P0C0L5     | 31.106                                                     | 30.887                                                     | 30.015                                                     | 31.115                                                     |                                              | 192.750                 | 6.890                     | C4B           | Complement C4-B                       |
| P13671     | 23.962                                                     | 23.872                                                     | 24.622                                                     | 24.025                                                     |                                              | 104.790                 | 6.390                     | C6            | Complement component C6               |
| P07358     | 23.124                                                     | 22.995                                                     |                                                            | 23.224                                                     |                                              | 67.047                  | 8.500                     | C8B           | Complement component C8 beta chain    |
| P02748     | 26.335                                                     | 25.168                                                     | 25.588                                                     | 25.762                                                     |                                              | 63.173                  | 5.430                     | C9            | Complement component C9               |
| P00751     | 23.042                                                     | 22.460                                                     |                                                            | 23.009                                                     |                                              | 85.532                  | 6.670                     | CFB           | Complement factor B                   |
| P00746     | 23.170                                                     | 25.032                                                     |                                                            | 24.839                                                     |                                              | 27.033                  | 7.650                     | CFD           | Complement factor D                   |
| P08603     | 27.620                                                     | 28.453                                                     | 26.821                                                     | 27.655                                                     |                                              | 139.090                 | 6.210                     | CFH           | Complement factor H                   |
| Q03591     | 22.948                                                     |                                                            |                                                            |                                                            |                                              | 37.650                  | 7.390                     | CFHR1         | Complement factor H-related protein 1 |
| Q9BXR6     |                                                            | 23.238                                                     | 22.355                                                     |                                                            |                                              | 64.419                  | 6.800                     | CFHR5         | Complement factor H-related protein 5 |
| P02671     | 33.461                                                     | 33.238                                                     | 32.645                                                     | 32.956                                                     | 31.096                                       | 94.972                  | 5.700                     | FGA           | Fibrinogen alpha chain                |
| P02675     | 32.366                                                     | 32.180                                                     | 31.297                                                     | 31.592                                                     | 28.998                                       | 55.928                  | 8.540                     | FGB           | Fibrinogen beta chain                 |
| P02679-2   | 32.309                                                     | 32.199                                                     | 31.786                                                     | 31.710                                                     | 29.121                                       | 49.496                  | 5.370                     | FGG           | Fibrinogen gamma chain                |
| P02751-10  | 25.510                                                     | 25.578                                                     | 25.042                                                     | 25.585                                                     |                                              | 239.620                 | 5.460                     | FN1           | Fibronectin                           |
| O75636-2   | 21.451                                                     | 24.653                                                     |                                                            | 20.581                                                     |                                              | 31.677                  | 6.200                     | FCN3          | Ficolin-3                             |
| P30043     | 24.383                                                     | 25.455                                                     | 25.001                                                     | 26.546                                                     |                                              | 22.119                  | 7.130                     | BLVRB         | Flavin reductase (NADPH)              |
| P06396-2   | 26.941                                                     | 26.630                                                     | 25.308                                                     | 25.446                                                     |                                              | 80.640                  | 5.900                     | GSN           | Gelsolin                              |
| P00738     | 23.710                                                     |                                                            |                                                            |                                                            |                                              | 45.205                  | 6.130                     | HP            | Haptoglobin                           |
| P00739     | 24.622                                                     | 24.450                                                     | 23.730                                                     | 24.390                                                     |                                              | 39.029                  | 6.630                     | HPR           | Haptoglobin-related protein           |
| P69905     | 24.725                                                     | 25.574                                                     | 25.068                                                     | 26.503                                                     |                                              | 15.257                  | 8.720                     | HBA1          | Hemoglobin subunit alpha              |
| P68871     | 25.271                                                     | 25.557                                                     | 25.401                                                     | 26.544                                                     |                                              | 15.998                  | 6.740                     | HBB           | Hemoglobin subunit beta               |
| P02790     | 25.606                                                     | 24.070                                                     | 22.841                                                     | 22.397                                                     |                                              | 51.676                  | 6.550                     | HPX           | Hemopexin                             |
| P05546     | 24.449                                                     | 23.707                                                     | 23.954                                                     | 24.389                                                     |                                              | 57.070                  | 6.410                     | SERPIND1      | Heparin cofactor 2                    |
| P04196     | 24.919                                                     | 26.513                                                     | 26.606                                                     | 27.198                                                     |                                              | 59.578                  | 7.090                     | HRG           | Histidine-rich glycoprotein           |
| P01876     | 27.828                                                     | 28.028                                                     | 27.347                                                     | 27.746                                                     |                                              | 37.654                  | 6.080                     | IGHA1         | Ig alpha-1 chain C region             |
| P01857     | 29.768                                                     | 30.252                                                     | 30.669                                                     | 30.446                                                     |                                              | 36.105                  | 8.460                     | IGHG1         | Ig gamma-1 chain C region             |
| P01859     | 25.711                                                     | 26.230                                                     | 25.861                                                     | 26.075                                                     |                                              | 35.900                  | 7.660                     | IGHG2         | Ig gamma-2 chain C region             |
| P01860     | 25.887                                                     | 26.440                                                     | 25.423                                                     | 26.604                                                     |                                              | 41.287                  | 8.230                     | IGHG3         | Ig gamma-3 chain C region             |
| P01781     | 25.025                                                     | 25.196                                                     |                                                            | 24.148                                                     |                                              | 11.771                  | 8.700                     |               | Ig heavy chain V-III region GAL       |
| P01764     | 24.606                                                     | 24.416                                                     | 24.074                                                     | 24.153                                                     |                                              | 12.582                  | 8.490                     |               | Ig heavy chain V-III region VH26      |
| P01834     | 28.988                                                     | 29.360                                                     | 29.036                                                     | 29.472                                                     |                                              | 11.609                  | 5.580                     | IGKC          | Ig kappa chain C region               |
| P01617     | 24.646                                                     | 25.227                                                     |                                                            | 24.815                                                     |                                              | 12.059                  | 5.690                     |               | Ig kappa chain V-II region TEW        |
| P04433     | 24.403                                                     | 24.020                                                     | 24.299                                                     | 23.314                                                     |                                              | 12.575                  | 4.850                     |               | Ig kappa chain V-III region VG        |
| P01623     | 26.998                                                     | 26.765                                                     | 26.901                                                     | 26.235                                                     |                                              | 11.746                  | 9.070                     |               | Ig kappa chain V-III region WOL       |
| P06312     | 24.552                                                     | 24.764                                                     | 24.368                                                     | 24.820                                                     |                                              | 13.380                  | 5.090                     | IGKV4-1       | Ig kappa chain V-IV region            |
| POCG05     | 28.285                                                     | 27.873                                                     | 27.574                                                     | 27.506                                                     |                                              | 11.293                  | 6.910                     | IGLC2         | Ig lambda-2 chain C regions           |

| Uniprot ID | log <sub>2</sub> Av.<br>(intensity<br>AgNP-CIT-<br>20F-3h) | log <sub>2</sub> Av.<br>(intensity<br>AgNP-CIT-<br>20M-3h) | log <sub>2</sub> Av.<br>(intensity<br>AgNP-PVP-<br>20F-3h) | log <sub>2</sub> Av.<br>(intensity<br>AgNP-PVP-<br>20M-3h) | log <sub>2</sub> Av.<br>(intensity<br>blank) | Mol.<br>weight<br>[kDa] | Isoelectric<br>Point (pI) | Gene<br>names | Protein names                                           |
|------------|------------------------------------------------------------|------------------------------------------------------------|------------------------------------------------------------|------------------------------------------------------------|----------------------------------------------|-------------------------|---------------------------|---------------|---------------------------------------------------------|
| P01871     | 28.126                                                     | 28.742                                                     | 27.097                                                     | 28.698                                                     |                                              | 49.306                  | 6.350                     | IGHM          | Ig mu chain C region                                    |
| C9JA05     |                                                            |                                                            |                                                            | 23.970                                                     |                                              | 8.168                   | 8.770                     | IGJ           | Immunoglobulin J chain                                  |
| B9A064     | 28.847                                                     | 28.957                                                     | 27.215                                                     | 28.148                                                     |                                              | 23.063                  | 9.080                     | IGLL5         | Immunoglobulin lambda-like polypeptide 5                |
| P05019-3   | 23.183                                                     | 24.204                                                     | 22.760                                                     | 21.367                                                     |                                              | 15.177                  | 9.780                     | IGF-1         | Insulin-like growth factor I                            |
| P01344     | 22.812                                                     | 22.929                                                     | 23.256                                                     | 23.142                                                     |                                              | 20.140                  | 9.500                     | IGF2          | Insulin-like growth factor II                           |
| P18065     | 25.401                                                     | 24.354                                                     | 25.170                                                     | 24.849                                                     |                                              | 20.281                  | 8.170                     | IGFBP2        | Insulin-like growth factor-binding protein 2            |
| P17936     | 26.796                                                     | 27.659                                                     | 26.575                                                     | 26.800                                                     |                                              | 31.674                  | 9.030                     | IGFBP3        | Insulin-like growth factor-binding protein 3            |
| P24593     | 26.366                                                     | 26.862                                                     | 25.585                                                     | 25.579                                                     |                                              | 30.570                  | 8.580                     | IGFBP5        | Insulin-like growth factor-binding protein 5            |
| Q16270-2   | 23.250                                                     | 23.439                                                     |                                                            | 22.593                                                     |                                              | 28.860                  | 8.250                     | IGFBP7        | Insulin-like growth factor-binding protein 7            |
| P19823     | 27.760                                                     | 27.162                                                     | 27.469                                                     | 27.038                                                     |                                              | 106.463                 | 6.400                     | ITIH2         | Inter-alpha-trypsin inhibitor heavy chain H2            |
| Q14624     | 31.846                                                     | 31.184                                                     | 32.066                                                     | 31.254                                                     |                                              | 103.360                 | 6.510                     | ITIH4         | Inter-alpha-trypsin inhibitor heavy chain H4            |
| P01042-2   | 26.241                                                     | 26.139                                                     | 25.650                                                     | 24.231                                                     |                                              | 47.883                  | 6.340                     | KNG1          | Isoform LMW of Kininogen-1                              |
| P35527     | 21.177                                                     |                                                            |                                                            |                                                            |                                              | 62.064                  | 5.140                     | KRT9          | Keratin, type I cytoskeletal 9                          |
| P04264     | 23.419                                                     | 23.598                                                     |                                                            | 23.402                                                     |                                              | 66.038                  | 8.150                     | KRT1          | Keratin, type II cytoskeletal 1                         |
| P01042     | 35.422                                                     | 35.570                                                     | 35.432                                                     | 35.258                                                     |                                              | 71.957                  | 6.290                     | KNG1          | Kininogen-1                                             |
| P02788-2   | 27.422                                                     | 26.857                                                     | 27.371                                                     | 26.590                                                     |                                              | 73.160                  | 8.500                     | LTF           | Lactotransferrin                                        |
| P18428     | 24.440                                                     | 23.693                                                     |                                                            | 23.978                                                     |                                              | 53.383                  | 6.230                     | LBP           | Lipopolysaccharide-binding protein                      |
| Q13201     | 22.928                                                     |                                                            |                                                            |                                                            |                                              | 138.110                 | 8.150                     | MMRN1         | Multimerin-1                                            |
| P03952     | 31.054                                                     | 31.642                                                     | 30.768                                                     | 31.957                                                     |                                              | 71.369                  | 8.600                     | KLKB1         | Plasma kallikrein                                       |
| P05155     | 28.019                                                     | 28.657                                                     | 29.203                                                     | 29.265                                                     |                                              | 55.154                  | 6.090                     | SERPING1      | Plasma protease C1 inhibitor                            |
| P05154     | 28.755                                                     | 28.747                                                     | 28.739                                                     | 29.489                                                     |                                              | 45.674                  | 9.300                     | SERPINA5      | Plasma serine protease inhibitor                        |
| P00747     | 26.628                                                     | 26.898                                                     | 25.982                                                     | 26.811                                                     |                                              | 90.568                  | 7.040                     | PLG           | Plasminogen                                             |
| P02775     | 24.557                                                     | 25.677                                                     | 24.691                                                     | 25.291                                                     |                                              | 13.894                  | 9.040                     | PPBP          | Platelet basic protein                                  |
| P02776     | 29.501                                                     | 28.997                                                     | 27.983                                                     | 28.995                                                     |                                              | 10.845                  | 8.930                     | PF4           | Platelet factor 4                                       |
| P02760     | 22.684                                                     |                                                            |                                                            |                                                            |                                              | 38.999                  | 5.950                     | AMBP          | Protein AMBP                                            |
| P05109     | 24.048                                                     | 24.858                                                     | 23.474                                                     | 24.348                                                     |                                              | 10.834                  | 6.500                     | S100A8        | Protein S100-A8                                         |
| P06702     | 26.491                                                     | 26.822                                                     | 25.883                                                     | 26.187                                                     |                                              | 13.242                  | 5.710                     | S100A9        | Protein S100-A9                                         |
| Q92954-5   | 28.904                                                     | 29.271                                                     | 29.233                                                     | 29.842                                                     |                                              | 102.510                 | 9.530                     | PRG4          | Proteoglycan 4                                          |
| P00734     | 23.498                                                     | 23.368                                                     | 23.425                                                     | 23.341                                                     |                                              | 70.036                  | 5.630                     | F2            | Prothrombin                                             |
| P34096     | 23.629                                                     | 23.545                                                     |                                                            | 23.477                                                     |                                              | 16.840                  | 9.300                     | RNASE4        | Ribonuclease 4                                          |
| P49908     | 24.440                                                     | 25.532                                                     | 24.298                                                     | 26.605                                                     |                                              | 43.353                  | 8.080                     | SEPP1         | Selenoprotein P                                         |
| P02787     | 26.306                                                     | 25.972                                                     | 25.201                                                     | 25.669                                                     |                                              | 77.063                  | 6.810                     | TF            | Serotransferrin                                         |
| P02768     | 29.650                                                     | 29.701                                                     | 29.399                                                     | 30.457                                                     | 27.803                                       | 69.366                  | 5.920                     | ALB           | Serum albumin                                           |
| P35542     | 25.320                                                     | 24.366                                                     | 24.501                                                     | 23.770                                                     |                                              | 14.746                  | 9.170                     | SAA4          | Serum amyloid A-4 protein                               |
| P27169     | 26.110                                                     | 25.643                                                     | 25.659                                                     | 25.923                                                     |                                              | 39.731                  | 5.080                     | PON1          | Serum paraoxonase/arylesterase 1                        |
| P04278-5   | 23.082                                                     | 21.835                                                     |                                                            |                                                            |                                              | 41.712                  | 6.220                     | SHBG          | Sex hormone-binding globulin                            |
| Q8TER0-5   | 21.780                                                     | 21.997                                                     |                                                            | 21.576                                                     |                                              | 142.070                 | 6.590                     | SNED1         | Sushi, nidogen and EGF-like domain-containing protein 1 |
| P07996     | 23.941                                                     | 23.748                                                     | 23.226                                                     | 23.680                                                     |                                              | 129.380                 | 4.710                     | THBS1         | Thrombospondin-1                                        |

| Uniprot ID | log <sub>2</sub> Av.<br>(intensity<br>AgNP-CIT-<br>20F-3h) | log <sub>2</sub> Av.<br>(intensity<br>AgNP-CIT-<br>20M-3h) | log <sub>2</sub> Av.<br>(intensity<br>AgNP-PVP-<br>20F-3h) | log <sub>2</sub> Av.<br>(intensity<br>AgNP-PVP-<br>20M-3h) | log <sub>2</sub> Av.<br>(intensity<br>blank) | Mol.<br>weight<br>[kDa] | Isoelectric<br>Point (pI) | Gene<br>names | Protein names                                         |
|------------|------------------------------------------------------------|------------------------------------------------------------|------------------------------------------------------------|------------------------------------------------------------|----------------------------------------------|-------------------------|---------------------------|---------------|-------------------------------------------------------|
| Q15582     |                                                            |                                                            |                                                            | 23.060                                                     |                                              | 74.681                  | 7.620                     | TGFBI         | Transforming growth factor-beta-induced protein ig-h3 |
| P02766     | 28.030                                                     | 27.951                                                     | 27.150                                                     | 27.363                                                     |                                              | 15.887                  | 5.490                     | TTR           | Transthyretin                                         |
| P07225     | 23.728                                                     | 23.764                                                     | 23.350                                                     |                                                            |                                              | 75.122                  | 5.480                     | PROS1         | Vitamin K-dependent protein S                         |
| P04004     | 32.813                                                     | 32.714                                                     | 33.092                                                     | 32.789                                                     |                                              | 54.305                  | 5.550                     | VTN           | Vitronectin                                           |
| Q6ZN30     | 26.312                                                     |                                                            |                                                            |                                                            |                                              | 122.330                 | 6.070                     | BNC2          | Zinc finger protein basoonclin-1                      |

Table S2. Correlation analysis of corona proteins' pI and MW with their label-free quantification intensities.

|    |                         | <b>AgNP-CIT-20F</b> | <b>AgNP-CIT-20M</b> | <b>AgNP-PVP-20F</b> | <b>AgNP-PVP-20M</b> |
|----|-------------------------|---------------------|---------------------|---------------------|---------------------|
| pI | Correlation Coefficient | -0.138              | -0.105              | -0.158              | -0.146              |
|    | <i>p</i> value*         | 0.151               | 0.295               | 0.152               | 0.146               |
| MW | Correlation Coefficient | 0.119               | 0.078               | 0.204               | 0.163               |
|    | <i>p</i> value*         | 0.215               | 0.433               | 0.063               | 0.106               |

\*Two tailed Spearman test was used.

Table S3. All enriched GO biological processes for identified corona proteins

| GO ID      | GO Term                                  | GO Levels       | Nr. Genes | % Associated Genes | Term p -Value Corrected with Bonferroni step down | Associated Genes Found                                                                                                                                                                                                                        |
|------------|------------------------------------------|-----------------|-----------|--------------------|---------------------------------------------------|-----------------------------------------------------------------------------------------------------------------------------------------------------------------------------------------------------------------------------------------------|
| GO:0002253 | activation of immune response            | [2, 4, 5, 6]    | 30        | 5.1457977          | 5.59E-17                                          | [A2M, C1QA, C1QB, C1QC, C1R, C3, C4A, C4B, C6, C8B, C9, CFB, CFD, CFH, CFHR1, CFHR5, CLU, FCN3, IGHG1, IGHG2, IGHG3, IGKC, IGKV4-1, IGLC2, KRT1, LBP, LTF, PROS1, SERPING1, VTN]                                                              |
| GO:0002526 | acute inflammatory response              | [5]             | 26        | 17.931034          | 1.90E-28                                          | [A2M, AHSG, APOA2, C3, C4A, C4B, C6, C8B, C9, CFB, CFH, F12, F2, FN1, HP, HPR, ITIH4, KLKB1, LBP, PROS1, S100A8, SAA4, SERPINA1, SERPINF2, SERPING1, VTN]                                                                                     |
| GO:0006953 | acute-phase response                     | [6]             | 10        | 18.181818          | 8.71E-10                                          | [AHSG, F2, FN1, HP, HPR, ITIH4, LBP, SAA4, SERPINA1, SERPINF2]                                                                                                                                                                                |
| GO:0002250 | adaptive immune response                 | [3]             | 21        | 5.357143           | 1.85E-11                                          | [C1QA, C1QB, C1QC, C1R, C3, C4A, C4B, C6, C8B, C9, CLU, HPX, IGHG1, IGHG2, IGHG3, IGHM, IGJ, IGKC, IGKV4-1, IGLC2, SERPING1]                                                                                                                  |
| GO:0043277 | apoptotic cell clearance                 | [4, 5, 6, 7]    | 5         | 13.888889          | 0.001733726                                       | [C3, C4A, C4B, FCN3, THBS1]                                                                                                                                                                                                                   |
| GO:0007596 | blood coagulation                        | [4, 5]          | 38        | 6.5404477          | 2.62E-26                                          | [A2M, ALB, APOA1, APOB, APOE, APOH, CFD, CLU, F11, F12, F2, F5, FGA, FGB, FGG, FN1, HBB, HRG, IGF1, IGF2, KLKB1, KNG1, KRT1, MMRN1, PF4, PLG, PPBP, PROS1, SEPP1, SERPINA1, SERPINA5, SERPINC1, SERPIND1, SERPINF2, SERPING1, TF, THBS1, VTN] |
| GO:0072378 | blood coagulation, fibrin clot formation | [3, 4, 5, 6]    | 10        | 37.037037          | 2.97E-13                                          | [A2M, APOH, F11, F12, F2, FGA, KLKB1, KNG1, SERPINC1, SERPING1]                                                                                                                                                                               |
| GO:0001775 | cell activation                          | [3]             | 33        | 3.4303534          | 1.10E-13                                          | [A2M, ALB, APOA1, APOE, CFD, CLU, F2, F5, FGA, FGB, FGG, FN1, HBB, HRG, IGF1, IGF2, IGFBP2, KNG1, LBP, MMRN1, PF4, PLG, PPBP, PROS1, S100A8, S100A9, SEPP1, SERPINA1, SERPINF2, SERPING1, SNCA, TF, THBS1]                                    |
| GO:0016477 | cell migration                           | [3, 4, 5]       | 22        | 1.9147085          | 0.001025016                                       | [ANG, APOA1, APOB, APOE, APOH, CDH1, F2, FN1, HRG, IGF1, IGFBP3, IGFBP5, LBP, PF4, PLG, PPBP, PROS1, S100A8, S100A9, SEPP1, THBS1, VTN]                                                                                                       |
| GO:0048878 | chemical homeostasis                     | [4]             | 21        | 2.1276596          | 3.49E-04                                          | [APOA1, APOA2, APOA4, APOA5, APOB, APOC2, APOC4, APOE, CDH1, CFH, F2, HPX, IGF1, IGFBP5, KNG1, KRT1, LTF, S100A8, S100A9, SNCA, TF]                                                                                                           |
| GO:0042632 | cholesterol homeostasis                  | [7]             | 7         | 9.589041           | 2.22E-04                                          | [APOA1, APOA2, APOA4, APOA5, APOB, APOC2, APOE]                                                                                                                                                                                               |
| GO:0008203 | cholesterol metabolic process            | [6]             | 8         | 6.0150375          | 0.001103614                                       | [APOA1, APOA2, APOA4, APOA5, APOB, APOC1, APOE, APOL1]                                                                                                                                                                                        |
| GO:0030301 | cholesterol transport                    | [5, 6, 7]       | 10        | 13.513514          | 1.91E-08                                          | [APOA1, APOA2, APOA4, APOA5, APOB, APOC1, APOC2, APOE, CLU, PON1]                                                                                                                                                                             |
| GO:0034382 | chylomicron remnant clearance            | [5, 6]          | 3         | 42.857143          | 0.005076655                                       | [APOC1, APOC2, APOE]                                                                                                                                                                                                                          |
| GO:0006956 | complement activation                    | [3, 4, 5, 6, 7] | 28        | 14.893617          | 1.78E-28                                          | [A2M, C1QA, C1QB, C1QC, C1R, C3, C4A, C4B, C6, C8B, C9, CFB, CFD, CFH, CFHR1, CFHR5, CLU, FCN3, IGHG1, IGHG2, IGHG3, IGKC, IGKV4-1, IGLC2, KRT1, PROS1, SERPING1, VTN]                                                                        |

| GO ID      | GO Term                                                        | GO Levels       | Nr. Genes | % Associated Genes | Term p -Value Corrected with Bonferroni step down | Associated Genes Found                                                                                                                                                                                                                                                                                                                                                         |
|------------|----------------------------------------------------------------|-----------------|-----------|--------------------|---------------------------------------------------|--------------------------------------------------------------------------------------------------------------------------------------------------------------------------------------------------------------------------------------------------------------------------------------------------------------------------------------------------------------------------------|
| GO:0006957 | complement activation, alternative pathway                     | [4, 5, 6, 7, 8] | 7         | 36.842106          | 9.60E-09                                          | [C3, C8B, C9, CFB, CFD, CFH, CFHR5]                                                                                                                                                                                                                                                                                                                                            |
| GO:0001867 | complement activation, lectin pathway                          | [4, 5, 6, 7, 8] | 4         | 44.444443          | 1.17E-04                                          | [A2M, FCN3, KRT1, SERPING1]                                                                                                                                                                                                                                                                                                                                                    |
| GO:0006952 | defense response                                               | [3]             | 60        | 3.4843206          | 5.26E-30                                          | [A2M, AHSG, APOA1, APOA2, APOA4, APOE, APOL1, C1QA, C1QB, C1QC, C1R, C3, C4A, C4B, C6, C8B, C9, CFB, CFD, CFH, CFHR5, CLU, F12, F2, FCN3, FGA, FGB, FN1, HP, HPR, HPX, HRG, IGHG1, IGHG2, IGHG3, IGHM, IGJ, IGKC, IGKV4-1, IGLC2, ITIH4, KLKB1, KNG1, KRT1, LBP, LTF, PF4, PPBP, PROS1, S100A8, S100A9, SAA4, SEPP1, SERPINA1, SERPINC1, SERPINF2, SERPING1, SNCA, THBS1, VTN] |
| GO:0006897 | endocytosis                                                    | [5]             | 31        | 4.223433           | 3.48E-15                                          | [AHSG, ALB, AMBP, APOA1, APOA5, APOB, APOC1, APOC2, APOE, APOL1, C3, C4A, C4B, COLEC11, FCN3, HBB, HP, HPR, HPX, IGHA1, IGHG1, IGHG2, IGHG3, IGKC, IGKV4-1, IGLC2, LBP, PRG4, SNCA, THBS1, VTN]                                                                                                                                                                                |
| GO:0051649 | establishment of localization in cell                          | [3]             | 33        | 1.3398294          | 4.59E-03                                          | [A2M, ALB, ANG, APOA1, APOA2, APOE, CDH1, CFD, CLU, F2, F5, FGA, FGB, FGG, FN1, HRG, IGF1, IGF2, KNG1, MMRN1, PF4, PLG, PPBP, PROS1, S100A8, S100A9, SEPP1, SERPINA1, SERPINF2, SERPING1, SNCA, TF, THBS1]                                                                                                                                                                     |
| GO:0006887 | exocytosis                                                     | [4, 5, 6, 7]    | 26        | 6.5656567          | 6.12E-17                                          | [A2M, ALB, APOA1, CFD, CLU, F5, FGA, FGB, FGG, FN1, HRG, IGF1, IGF2, KNG1, MMRN1, PF4, PLG, PPBP, PROS1, SEPP1, SERPINA1, SERPINF2, SERPING1, SNCA, TF, THBS1]                                                                                                                                                                                                                 |
| GO:0030198 | extracellular matrix organization                              | [4]             | 14        | 3.5264482          | 1.02E-04                                          | [A2M, CDH1, FGA, FGB, FGG, FN1, KLKB1, PLG, SERPINF2, SNCA, TGFBI, THBS1, TTR, VTN]                                                                                                                                                                                                                                                                                            |
| GO:0042730 | fibrinolysis                                                   | [5, 6, 7, 8, 9] | 12        | 42.857143          | 3.38E-17                                          | [APOH, F11, F12, F2, HRG, KLKB1, KRT1, PLG, PROS1, SERPINF2, SERPING1, THBS1]                                                                                                                                                                                                                                                                                                  |
| GO:0046503 | glycerolipid catabolic process                                 | [5, 6]          | 8         | 17.777779          | 2.04E-07                                          | [APOA1, APOA2, APOA4, APOA5, APOB, APOC1, APOC2, APOE]                                                                                                                                                                                                                                                                                                                         |
| GO:0046486 | glycerolipid metabolic process                                 | [4, 5]          | 12        | 3.4482758          | 1.03E-03                                          | [ANG, APOA1, APOA2, APOA4, APOA5, APOB, APOC1, APOC2, APOE, APOH, C3, PON1]                                                                                                                                                                                                                                                                                                    |
| GO:0034380 | high-density lipoprotein particle assembly                     | [4, 5, 7]       | 5         | 45.454544          | 2.61E-06                                          | [APOA1, APOA2, APOA4, APOA5, APOE]                                                                                                                                                                                                                                                                                                                                             |
| GO:0034384 | high-density lipoprotein particle clearance                    | [4, 5]          | 4         | 40                 | 1.93E-04                                          | [APOA1, APOA2, APOC2, APOE]                                                                                                                                                                                                                                                                                                                                                    |
| GO:0034375 | high-density lipoprotein particle remodeling                   | [4, 5, 7]       | 5         | 31.25              | 2.36E-05                                          | [APOA1, APOA2, APOA4, APOC1, APOE]                                                                                                                                                                                                                                                                                                                                             |
| GO:0042592 | homeostatic process                                            | [3]             | 28        | 1.8555335          | 5.18E-05                                          | [ALB, ANG, APOA1, APOA2, APOA4, APOA5, APOB, APOC2, APOC4, APOE, CDH1, CFH, F2, HPX, IGF1, IGFBP5, IGHA1, IGHG3, IGJ, IGKC, KNG1, KRT1, LTF, PLG, S100A8, S100A9, SNCA, TF]                                                                                                                                                                                                    |
| GO:0006959 | humoral immune response                                        | [3]             | 31        | 11.071428          | 9.21E-28                                          | [A2M, C1QA, C1QB, C1QC, C1R, C3, C4A, C4B, C6, C8B, C9, CFB, CFD, CFH, CFHR1, CFHR5, CLU, FCN3, HPX, IGHG1, IGHG2, IGHG3, IGHM, IGKC, IGKV4-1, IGLC2, KRT1, LTF, PROS1, SERPING1, VTN]                                                                                                                                                                                         |
| GO:0002455 | humoral immune response mediated by circulating immunoglobulin | [4, 7]          | 19        | 10.326087          | 2.07E-15                                          | [C1QA, C1QB, C1QC, C1R, C3, C4A, C4B, C6, C8B, C9, CLU, HPX, IGHG1, IGHG2, IGHG3, IGKC, IGKV4-1, IGLC2, SERPING1]                                                                                                                                                                                                                                                              |



| GO ID      | GO Term                                               | GO Levels       | Nr. Genes | % Associated Genes | Term p -Value Corrected with Bonferroni step down | Associated Genes Found                                                                                                                                                                                                                                                                                                                                                                                                                                                                                                                |
|------------|-------------------------------------------------------|-----------------|-----------|--------------------|---------------------------------------------------|---------------------------------------------------------------------------------------------------------------------------------------------------------------------------------------------------------------------------------------------------------------------------------------------------------------------------------------------------------------------------------------------------------------------------------------------------------------------------------------------------------------------------------------|
| GO:0042744 | hydrogen peroxide catabolic process                   | [3, 4, 5]       | 5         | 18.518518          | 4.02E-04                                          | [APOA4, HBB, HP, HPR, SNCA]                                                                                                                                                                                                                                                                                                                                                                                                                                                                                                           |
| GO:0006954 | inflammatory response                                 | [4]             | 36        | 5.590062           | 2.53E-22                                          | [A2M, AHSG, APOA1, APOA2, APOE, C3, C4A, C4B, C6, C8B, C9, CFB, CFH, F12, F2, FN1, HP, HPR, ITIH4, KLKB1, KNG1, KRT1, LBP, PF4, PPBP, PROS1, S100A8, S100A9, SAA4, SEPP1, SERPINA1, SERPINC1, SERPINF2, SERPING1, THBS1, VTN]                                                                                                                                                                                                                                                                                                         |
| GO:0045087 | innate immune response                                | [3, 4]          | 40        | 3.6968577          | 1.35E-18                                          | [A2M, APOA4, APOL1, C1QA, C1QB, C1QC, C1R, C3, C4A, C4B, C6, C8B, C9, CFB, CFD, CFH, CFHR5, CLU, F12, FCN3, FGA, FGB, HPX, IGHG1, IGHG2, IGHG3, IGHM, IGJ, IGKC, IGKV4-1, IGLC2, KRT1, LBP, LTF, PROS1, S100A8, S100A9, SERPING1, SNCA, VTN]                                                                                                                                                                                                                                                                                          |
| GO:0050900 | leukocyte migration                                   | [2, 4, 5, 6]    | 12        | 3.5928144          | 6.78E-04                                          | [APOB, F2, FN1, LBP, PF4, PLG, PPBP, PROS1, S100A8, S100A9, SEPP1, THBS1]                                                                                                                                                                                                                                                                                                                                                                                                                                                             |
| GO:0002523 | leukocyte migration involved in inflammatory response | [3, 5, 6, 7]    | 4         | 26.666666          | 1.18E-03                                          | [LBP, PPBP, S100A8, S100A9]                                                                                                                                                                                                                                                                                                                                                                                                                                                                                                           |
| GO:0055088 | lipid homeostasis                                     | [5]             | 8         | 6.9565215          | 3.74E-04                                          | [APOA1, APOA2, APOA4, APOA5, APOB, APOC2, APOC4, APOE]                                                                                                                                                                                                                                                                                                                                                                                                                                                                                |
| GO:0010876 | lipid localization                                    | [3]             | 20        | 5.8139534          | 1.78E-11                                          | [ALB, APOA1, APOA2, APOA4, APOA5, APOB, APOC1, APOC2, APOC4, APOE, APOH, APOL1, C3, CLU, LBP, PON1, S100A8, S100A9, SERPINA5, THBS1]                                                                                                                                                                                                                                                                                                                                                                                                  |
| GO:0006629 | lipid metabolic process                               | [3]             | 22        | 1.6666666          | 9.15E-03                                          | [ALB, ANG, APOA1, APOA2, APOA4, APOA5, APOB, APOC1, APOC2, APOC4, APOE, APOH, APOL1, C3, CLU, IGF2, IGFBP7, PON1, S100A8, S100A9, SNCA, TTR]                                                                                                                                                                                                                                                                                                                                                                                          |
| GO:0042157 | lipoprotein metabolic process                         | [4, 5]          | 11        | 8.088235           | 5.25E-07                                          | [ALB, APOA1, APOA2, APOA4, APOA5, APOB, APOC1, APOC2, APOE, APOL1, PON1]                                                                                                                                                                                                                                                                                                                                                                                                                                                              |
| GO:0043170 | macromolecule metabolic process                       | [3]             | 82        | 0.91917944         | 2.19E-05                                          | [A2M, AHSG, ALB, AMBP, ANG, APOA1, APOA2, APOA4, APOA5, APOB, APOC1, APOC2, APOE, APOH, APOL1, BNC2, C1QA, C1QB, C1QC, C1R, C3, C4A, C4B, C6, C8B, C9, CDH1, CFB, CFD, CFH, CFHR1, CFHR5, CLU, COLEC11, CPN1, F11, F12, F2, F5, FCN3, FGA, FN1, HP, HPR, HPX, HRG, IGF1, IGF2, IGFBP2, IGFBP3, IGFBP5, IGH1, IGHG1, IGHG2, IGHG3, IGKC, IGKV4-1, IGLC2, ITIH2, ITIH4, KLKB1, KNG1, KRT1, LBP, LTF, PF4, PLG, PON1, PRG4, PROS1, RNASE4, S100A8, S100A9, SERPINA1, SERPINA5, SERPINC1, SERPIND1, SERPINF2, SERPING1, SNCA, THBS1, VTN] |
| GO:0042116 | macrophage activation                                 | [4, 6]          | 6         | 11.764706          | 4.66E-04                                          | [CLU, LBP, S100A8, S100A9, SNCA, THBS1]                                                                                                                                                                                                                                                                                                                                                                                                                                                                                               |
| GO:2001234 | negative regulation of apoptotic signaling pathway    | [4, 5, 6, 7, 8] | 9         | 3.982301           | 6.96E-03                                          | [CLU, FGA, FGB, FGG, IGF1, PF4, S100A8, S100A9, THBS1]                                                                                                                                                                                                                                                                                                                                                                                                                                                                                |
| GO:0048519 | negative regulation of biological process             | [1, 2, 3]       | 60        | 1.3767784          | 3.85E-09                                          | [A2M, AHSG, AK1, ALB, AMBP, ANG, APOA1, APOA2, APOA4, APOC1, APOC2, APOE, APOH, ASPN, C1QC, C3, C4A, C4B, CDH1, CFH, CLU, F11, F12, F2, FCN3, FGA, FGB, FGG, GSN, HP, HPR, HRG, IGF1, IGFBP3, IGFBP5, IGFBP7, ITIH2, ITIH4, KLKB1, KNG1, KRT1, LBP, LTF, PF4, PLG, PON1, PRG4, PROS1, S100A8, S100A9, SERPINA1, SERPINA5, SERPINC1, SERPIND1, SERPINF2, SERPING1, SNCA, TGFB1, THBS1, VTN]                                                                                                                                            |
| GO:0030195 | negative regulation of blood coagulation              | [4, 5, 6, 7, 8] | 16        | 31.37255           | 6.13E-21                                          | [APOE, APOH, F11, F12, F2, FGA, HRG, KLKB1, KNG1, KRT1, PLG, PROS1, SERPINF2, SERPING1, THBS1, VTN]                                                                                                                                                                                                                                                                                                                                                                                                                                   |
| GO:0043086 | negative regulation of catalytic activity             | [3, 4, 5]       | 28        | 3.482587           | 2.55E-11                                          | [A2M, AHSG, AMBP, APOA1, APOA2, APOC1, APOC2, APOE, C3, C4A, C4B, HP, HPR, HRG, ITIH2, ITIH4, KNG1, LTF, PROS1, SERPINA1, SERPINA5, SERPINC1, SERPIND1, SERPINF2, SERPING1, SNCA, THBS1, VTN]                                                                                                                                                                                                                                                                                                                                         |

| GO ID      | GO Term                                                   | GO Levels                | Nr. Genes | % Associated Genes | Term p -Value Corrected with Bonferroni step down | Associated Genes Found                                                                                                                                                                                                                                                                                                                                       |
|------------|-----------------------------------------------------------|--------------------------|-----------|--------------------|---------------------------------------------------|--------------------------------------------------------------------------------------------------------------------------------------------------------------------------------------------------------------------------------------------------------------------------------------------------------------------------------------------------------------|
| GO:0031324 | negative regulation of cellular metabolic process         | [3, 4, 5]                | 36        | 1.6933208          | 4.00E-06                                          | [A2M, AHSG, AMBP, ANG, APOA4, APOC1, APOE, C3, C4A, C4B, CLU, F2, FCN3, HP, HPR, HRG, IGF1, IGFBP3, IGFBP5, ITIH2, ITIH4, KNG1, PON1, PRG4, PROS1, S100A8, S100A9, SERPINA1, SERPINA5, SERPINC1, SERPIND1, SERPINF2, SERPING1, SNCA, THBS1, VTN]                                                                                                             |
| GO:0048523 | negative regulation of cellular process                   | [2, 3, 4]                | 55        | 1.3729405          | 8.46E-08                                          | [A2M, AHSG, AK1, ALB, AMBP, ANG, APOA1, APOA2, APOA4, APOC1, APOC2, APOE, APOH, ASPNC1QC, C3, C4A, C4B, CDH1, CFH, CLU, F2, FCN3, FGA, FGB, FGG, GSN, HP, HPR, HRG, IGF1, IGFBP3, IGFBP5, IGFBP7, ITIH2, ITIH4, KNG1, LTF, PF4, PLG, PON1, PRG4, PROS1, S100A8, S100A9, SERPINA1, SERPINA5, SERPINC1, SERPIND1, SERPINF2, SERPING1, SNCA, TGFB1, THBS1, VTN] |
| GO:0032269 | negative regulation of cellular protein metabolic process | [4, 5, 6, 7]             | 27        | 3.3415842          | 2.15E-10                                          | [A2M, AHSG, AMBP, ANG, APOE, C3, C4A, C4B, F2, HRG, IGFBP3, IGFBP5, ITIH2, ITIH4, KNG1, PROS1, S100A8, S100A9, SERPINA1, SERPINA5, SERPINC1, SERPIND1, SERPINF2, SERPING1, SNCA, THBS1, VTN]                                                                                                                                                                 |
| GO:0032375 | negative regulation of cholesterol transport              | [5, 6, 7, 8, 9]          | 4         | 30.76923           | 6.36E-04                                          | [APOA2, APOC1, APOC2, APOE]                                                                                                                                                                                                                                                                                                                                  |
| GO:0010951 | negative regulation of endopeptidase activity             | [6, 7, 8, 9, 10]         | 20        | 8.230453           | 2.22E-14                                          | [A2M, AHSG, AMBP, C3, C4A, C4B, HRG, ITIH2, ITIH4, KNG1, PROS1, SERPINA1, SERPINA5, SERPINC1, SERPIND1, SERPINF2, SERPING1, SNCA, THBS1, VTN]                                                                                                                                                                                                                |
| GO:0051918 | negative regulation of fibrinolysis                       | [2, 3, 4, 5, 6, 7, 8, 9] | 6         | 54.545456          | 1.56E-08                                          | [APOH, F2, HRG, PLG, SERPINF2, THBS1]                                                                                                                                                                                                                                                                                                                        |
| GO:0051346 | negative regulation of hydrolase activity                 | [4, 5, 6]                | 24        | 6.3324537          | 4.49E-15                                          | [A2M, AHSG, AMBP, APOA1, APOA2, APOC1, C3, C4A, C4B, HRG, ITIH2, ITIH4, KNG1, LTF, PROS1, SERPINA1, SERPINA5, SERPINC1, SERPIND1, SERPINF2, SERPING1, SNCA, THBS1, VTN]                                                                                                                                                                                      |
| GO:0002683 | negative regulation of immune system process              | [2, 3, 4]                | 11        | 3.2738094          | 4.60E-03                                          | [A2M, AMBP, APOA1, APOA2, C1QC, LTF, PF4, S100A8, S100A9, SERPING1, THBS1]                                                                                                                                                                                                                                                                                   |
| GO:0032369 | negative regulation of lipid transport                    | [3, 4, 5, 6, 7]          | 5         | 18.518518          | 4.02E-04                                          | [APOA2, APOC1, APOC2, APOE, THBS1]                                                                                                                                                                                                                                                                                                                           |
| GO:0010605 | negative regulation of macromolecule metabolic process    | [3, 4, 5]                | 34        | 1.6528926          | 2.31E-05                                          | [A2M, AHSG, AMBP, ANG, APOA4, APOE, C3, C4A, C4B, CLU, F2, FCN3, FGA, HRG, IGFBP3, IGFBP5, ITIH2, ITIH4, KNG1, PF4, PON1, PRG4, PROS1, S100A8, S100A9, SERPINA1, SERPINA5, SERPINC1, SERPIND1, SERPINF2, SERPING1, SNCA, THBS1, VTN]                                                                                                                         |
| GO:0009892 | negative regulation of metabolic process                  | [2, 3, 4]                | 42        | 1.7449107          | 3.93E-08                                          | [A2M, AHSG, AMBP, ANG, APOA1, APOA2, APOA4, APOC1, APOC2, APOE, C3, C4A, C4B, CLU, F2, FCN3, FGA, HP, HPR, HRG, IGF1, IGFBP3, IGFBP5, ITIH2, ITIH4, KNG1, LTF, PF4, PON1, PRG4, PROS1, S100A8, S100A9, SERPINA1, SERPINA5, SERPINC1, SERPIND1, SERPINF2, SERPING1, SNCA, THBS1, VTN]                                                                         |
| GO:0051241 | negative regulation of multicellular organismal process   | [2, 3, 4]                | 29        | 3.128371           | 1.22E-10                                          | [AHSG, APOA1, APOA2, APOC1, APOC2, APOE, APOH, ASPN, C1QC, F11, F12, F2, FGA, HRG, IGF1, IGFBP5, KLKB1, KNG1, KRT1, LBP, LTF, PF4, PLG, PRG4, PROS1, SERPINF2, SERPING1, THBS1, VTN]                                                                                                                                                                         |
| GO:0051248 | negative regulation of protein metabolic process          | [4, 5, 6]                | 32        | 3.6281178          | 7.24E-14                                          | [A2M, AHSG, AMBP, ANG, APOA4, APOE, C3, C4A, C4B, CLU, F2, FGA, HRG, IGFBP3, IGFBP5, ITIH2, ITIH4, KNG1, PON1, PRG4, PROS1, S100A8, S100A9, SERPINA1, SERPINA5, SERPINC1, SERPIND1, SERPINF2, SERPING1, SNCA, THBS1, VTN]                                                                                                                                    |
| GO:0045861 | negative regulation of proteolysis                        | [5, 6, 7, 8]             | 21        | 6.1764708          | 1.11E-12                                          | [A2M, AHSG, AMBP, C3, C4A, C4B, F2, HRG, ITIH2, ITIH4, KNG1, PROS1, SERPINA1, SERPINA5, SERPINC1, SERPIND1, SERPINF2, SERPING1, SNCA, THBS1, VTN]                                                                                                                                                                                                            |
| GO:0032102 | negative regulation of response to external stimulus      | [3, 4, 5]                | 19        | 7.949791           | 2.82E-13                                          | [APOA1, APOE, APOH, F11, F12, F2, FGA, HRG, KLKB1, KNG1, KRT1, LTF, PLG, PROS1, SERPINC1, SERPINF2, SERPING1, THBS1, VTN]                                                                                                                                                                                                                                    |
| GO:0048585 | negative regulation of response to stimulus               | [2, 3, 4]                | 37        | 2.820122           | 5.06E-13                                          | [A2M, AHSG, AMBP, APOA1, APOA2, APOE, APOH, ASPN, CDH1, CLU, F11, F12, F2, FGA, FGB, FGG, HP, HPR, HRG, IGF1, IGFBP3, IGFBP5, KLKB1, KNG1, KRT1, LTF, PF4, PLG, PROS1, S100A8, S100A9, SERPINC1, SERPINF2, SERPING1, SNCA, THBS1, VTN]                                                                                                                       |

| GO ID      | GO Term                                                | GO Levels                | Nr. Genes | % Associated Genes | Term p -Value Corrected with Bonferroni step down | Associated Genes Found                                                                                                                                                                                                                                                                                                                                                                                                                                                    |
|------------|--------------------------------------------------------|--------------------------|-----------|--------------------|---------------------------------------------------|---------------------------------------------------------------------------------------------------------------------------------------------------------------------------------------------------------------------------------------------------------------------------------------------------------------------------------------------------------------------------------------------------------------------------------------------------------------------------|
| GO:1903035 | negative regulation of response to wounding            | [3, 4, 5, 6]             | 18        | 11.920529          | 1.27E-15                                          | [APOA1, APOE, APOH, F11, F12, F2, FGA, HRG, KLKB1, KNG1, KRT1, PLG, PROS1, SERPINC1, SERPINF2, SERPING1, THBS1, VTN]                                                                                                                                                                                                                                                                                                                                                      |
| GO:0009968 | negative regulation of signal transduction             | [3, 4, 5, 6]             | 20        | 1.8656716          | 4.76E-03                                          | [AHSG, AMBP, APOA1, APOE, ASPN, CDH1, CLU, FGA, FGB, FGG, HRG, IGF1, IGFBP3, IGFBP5, LTF, PF4, S100A8, S100A9, SNCA, THBS1]                                                                                                                                                                                                                                                                                                                                               |
| GO:0006638 | neutral lipid metabolic process                        | [4, 5]                   | 12        | 9.302325           | 1.64E-08                                          | [ANG, APOA1, APOA2, APOA4, APOA5, APOB, APOC1, APOC2, APOE, APOH, C3, SNCA]                                                                                                                                                                                                                                                                                                                                                                                               |
| GO:0015850 | organic hydroxy compound transport                     | [3, 4, 5]                | 12        | 5.3333335          | 9.84E-06                                          | [ALB, APOA1, APOA2, APOA4, APOA5, APOB, APOC1, APOC2, APOE, CLU, PON1, SNCA]                                                                                                                                                                                                                                                                                                                                                                                              |
| GO:0071702 | organic substance transport                            | [4]                      | 33        | 1.337115           | 4.77E-03                                          | [ALB, ANG, APOA1, APOA2, APOA4, APOA5, APOB, APOC1, APOC2, APOC4, APOE, APOH, APOL1, C3, CDH1, CLU, FGA, FGB, FGG, HBB, HPX, HRG, IGF1, LBP, PON1, PPBP, S100A8, S100A9, SERPINA5, SNCA, TF, THBS1, TTR]                                                                                                                                                                                                                                                                  |
| GO:0006909 | phagocytosis                                           | [3, 4, 5, 6]             | 13        | 3.8575668          | 1.06E-04                                          | [AHSG, C3, C4A, C4B, FCN3, IGHG1, IGHG2, IGHG3, IGKC, IGKV4-1, IGLC2, LBP, THBS1]                                                                                                                                                                                                                                                                                                                                                                                         |
| GO:0033700 | phospholipid efflux                                    | [5, 6, 7, 8, 9]          | 7         | 53.846153          | 3.39E-10                                          | [APOA1, APOA2, APOA4, APOA5, APOC1, APOC2, APOE]                                                                                                                                                                                                                                                                                                                                                                                                                          |
| GO:0007603 | phototransduction, visible light                       | [5, 6, 7]                | 7         | 6.542056           | 2.84E-03                                          | [APOA1, APOA2, APOA4, APOB, APOC2, APOE, TTR]                                                                                                                                                                                                                                                                                                                                                                                                                             |
| GO:0034381 | plasma lipoprotein particle clearance                  | [3, 4]                   | 6         | 18.75              | 2.66E-05                                          | [APOA1, APOA2, APOB, APOC1, APOC2, APOE]                                                                                                                                                                                                                                                                                                                                                                                                                                  |
| GO:0034369 | plasma lipoprotein particle remodeling                 | [3, 4, 6]                | 8         | 29.62963           | 2.35E-09                                          | [APOA1, APOA2, APOA4, APOA5, APOB, APOC1, APOC2, APOE]                                                                                                                                                                                                                                                                                                                                                                                                                    |
| GO:0031639 | plasminogen activation                                 | [6, 7]                   | 6         | 33.333332          | 5.97E-07                                          | [APOH, F11, F12, KLKB1, SERPINF2, THBS1]                                                                                                                                                                                                                                                                                                                                                                                                                                  |
| GO:0030168 | platelet activation                                    | [4, 5, 6]                | 28        | 10.447762          | 4.88E-24                                          | [A2M, ALB, APOA1, APOE, CFD, CLU, F2, F5, FGA, FGB, FGG, FN1, HBB, HRG, IGF1, IGF2, KNG1, MMRN1, PF4, PLG, PPBP, PROS1, SEPP1, SERPINA1, SERPINF2, SERPING1, TF, THBS1]                                                                                                                                                                                                                                                                                                   |
| GO:0048518 | positive regulation of biological process              | [1, 2, 3]                | 76        | 1.4896119          | 1.64E-16                                          | [A2M, AHSG, ALB, ANG, APOA1, APOA2, APOA4, APOA5, APOB, APOC1, APOC2, APOC4, APOE, APOH, C1QA, C1QB, C1QC, C1R, C3, C4A, C4B, C6, C8B, C9, CDH1, CFB, CFD, CFH, CFHR1, CFHR5, CLU, F11, F12, F2, FCN3, FGA, FGB, FGG, FN1, GSN, HBB, HP, HPR, HPX, HRG, IGF1, IGF2, IGFBP2, IGFBP3, IGFBP5, IGHA1, IGHG1, IGHG2, IGHG3, IGJ, IGKC, IGKV4-1, IGLC2, KLKB1, KNG1, KRT1, LBP, LTF, PF4, PLG, PON1, PPBP, PROS1, S100A8, S100A9, SEPP1, SERPINF2, SERPING1, SNCA, THBS1, VTN] |
| GO:0051130 | positive regulation of cellular component organization | [2, 3, 4, 5]             | 21        | 2.4764152          | 2.80E-05                                          | [AHSG, APOA1, APOA5, APOC2, APOE, C3, C4A, C4B, CLU, FGA, FGB, FGG, FN1, GSN, HRG, IGF1, IGF2, IGJ, SERPINF2, SNCA, VTN]                                                                                                                                                                                                                                                                                                                                                  |
| GO:0045807 | positive regulation of endocytosis                     | [3, 4, 5, 6, 7]          | 7         | 7.2916665          | 1.40E-03                                          | [AHSG, APOA5, C3, C4A, C4B, SNCA, VTN]                                                                                                                                                                                                                                                                                                                                                                                                                                    |
| GO:0051919 | positive regulation of fibrinolysis                    | [2, 3, 4, 5, 6, 7, 8, 9] | 4         | 80                 | 4.85E-06                                          | [F11, F12, KLKB1, PLG]                                                                                                                                                                                                                                                                                                                                                                                                                                                    |

| GO ID      | GO Term                                                  | GO Levels    | Nr. Genes | % Associated Genes | Term p -Value Corrected with Bonferroni step down | Associated Genes Found                                                                                                                                                                                                                                                                                                                                                                                                                                                                                              |
|------------|----------------------------------------------------------|--------------|-----------|--------------------|---------------------------------------------------|---------------------------------------------------------------------------------------------------------------------------------------------------------------------------------------------------------------------------------------------------------------------------------------------------------------------------------------------------------------------------------------------------------------------------------------------------------------------------------------------------------------------|
| GO:0050778 | positive regulation of immune response                   | [3, 4, 5]    | 34        | 4.7091413          | 1.79E-18                                          | [A2M, C1QA, C1QB, C1QC, C1R, C3, C4A, C4B, C6, C8B, C9, CFB, CFD, CFH, CFHR1, CFHR5, CLU, FCN3, HPX, HRG, IGHG1, IGHG2, IGHG3, IGKC, IGKV4-1, IGLC2, KRT1, LBP, LTF, PROS1, S100A8, S100A9, SERPING1, VTN]                                                                                                                                                                                                                                                                                                          |
| GO:0002684 | positive regulation of immune system process             | [2, 3, 4]    | 41        | 4.1922293          | 3.07E-21                                          | [A2M, C1QA, C1QB, C1QC, C1R, C3, C4A, C4B, C6, C8B, C9, CFB, CFD, CFH, CFHR1, CFHR5, CLU, FCN3, HPX, HRG, IGF1, IGF2, IGFBP2, IGHG1, IGHG2, IGHG3, IGKC, IGKV4-1, IGLC2, KRT1, LBP, LTF, PF4, PPBP, PROS1, S100A8, S100A9, SEPP1, SERPING1, THBS1, VTN]                                                                                                                                                                                                                                                             |
| GO:1902533 | positive regulation of intracellular signal transduction | [4, 5, 6, 7] | 18        | 2.1791768          | 1.77E-03                                          | [APOA1, CLU, F2, FGA, FGB, FGG, HPX, IGF1, IGF2, IGFBP3, IGFBP5, LTF, PF4, S100A8, S100A9, SEPP1, SERPINF2, THBS1]                                                                                                                                                                                                                                                                                                                                                                                                  |
| GO:0046889 | positive regulation of lipid biosynthetic process        | [4, 5, 6, 7] | 6         | 10                 | 1.21E-03                                          | [APOA1, APOA4, APOA5, APOC2, APOE, IGF2]                                                                                                                                                                                                                                                                                                                                                                                                                                                                            |
| GO:0045834 | positive regulation of lipid metabolic process           | [3, 4, 5, 6] | 8         | 6.779661           | 4.53E-04                                          | [APOA1, APOA2, APOA4, APOA5, APOC1, APOC2, APOE, IGF2]                                                                                                                                                                                                                                                                                                                                                                                                                                                              |
| GO:0051240 | positive regulation of multicellular organismal process  | [2, 3, 4]    | 27        | 2.0626433          | 1.08E-05                                          | [ALB, APOA2, APOA5, APOC2, APOE, APOH, C3, C6, CLU, F12, F2, FGA, FGB, FGG, FN1, HRG, IGF1, KNG1, LBP, LTF, PF4, PLG, S100A8, S100A9, SEPP1, SERPINF2, THBS1]                                                                                                                                                                                                                                                                                                                                                       |
| GO:0045937 | positive regulation of phosphate metabolic process       | [5, 6, 7]    | 21        | 2.1042085          | 4.16E-04                                          | [ANG, APOC2, APOE, C3, CLU, F2, FGA, FGB, FGG, HPX, IGF1, IGF2, IGFBP3, LTF, PF4, S100A8, S100A9, SERPINF2, SNCA, THBS1, VTN]                                                                                                                                                                                                                                                                                                                                                                                       |
| GO:0042327 | positive regulation of phosphorylation                   | [6, 7, 8]    | 18        | 2.0408163          | 4.36E-03                                          | [ANG, C3, CLU, F2, FGA, FGB, FGG, HPX, IGF1, IGF2, IGFBP3, LTF, S100A8, S100A9, SERPINF2, SNCA, THBS1, VTN]                                                                                                                                                                                                                                                                                                                                                                                                         |
| GO:0010954 | positive regulation of protein processing                | [5, 6, 7]    | 4         | 23.529411          | 2.01E-03                                          | [C3, C6, F12, KLKB1]                                                                                                                                                                                                                                                                                                                                                                                                                                                                                                |
| GO:0048584 | positive regulation of response to stimulus              | [2, 3, 4]    | 54        | 2.721774           | 9.33E-21                                          | [A2M, ALB, APOA1, APOH, C1QA, C1QB, C1QC, C1R, C3, C4A, C4B, C6, C8B, C9, CFB, CFD, CFH, CFHR1, CFHR5, CLU, F12, F2, FCN3, FGA, FGB, FGG, HPX, HRG, IGF1, IGF2, IGFBP3, IGFBP5, IGHG1, IGHG2, IGHG3, IGKC, IGKV4-1, IGLC2, KLKB1, KRT1, LBP, LTF, PF4, PLG, PPBP, PROS1, S100A8, S100A9, SEPP1, SERPINF2, SERPING1, SNCA, THBS1, VTN]                                                                                                                                                                               |
| GO:1903036 | positive regulation of response to wounding              | [3, 4, 5, 6] | 14        | 9.459459           | 2.55E-10                                          | [APOH, C3, F12, F2, HRG, KLKB1, LBP, PLG, S100A8, S100A9, SEPP1, SERPINF2, THBS1, VTN]                                                                                                                                                                                                                                                                                                                                                                                                                              |
| GO:0051050 | positive regulation of transport                         | [2, 3, 4, 5] | 20        | 2.6455026          | 2.13E-05                                          | [AHSB, ANG, APOA5, APOE, C3, C4A, C4B, CDH1, CFH, F2, FGA, FGB, FGG, IGF1, KNG1, PON1, S100A8, S100A9, SNCA, VTN]                                                                                                                                                                                                                                                                                                                                                                                                   |
| GO:0090303 | positive regulation of wound healing                     | [4, 5, 6, 7] | 9         | 18.367348          | 1.11E-08                                          | [APOH, F12, F2, HRG, PLG, SEPP1, SERPINF2, THBS1, VTN]                                                                                                                                                                                                                                                                                                                                                                                                                                                              |
| GO:0072376 | protein activation cascade                               | [2, 3, 4, 5] | 36        | 16.90141           | 8.58E-40                                          | [A2M, APOH, C1QA, C1QB, C1QC, C1R, C3, C4A, C4B, C6, C8B, C9, CFB, CFD, CFH, CFHR1, CFHR5, CLU, F11, F12, F2, FCN3, FGA, IGHG1, IGHG2, IGHG3, IGKC, IGKV4-1, IGLC2, KLKB1, KNG1, KRT1, PROS1, SERPINC1, SERPING1, VTN]                                                                                                                                                                                                                                                                                              |
| GO:0019538 | protein metabolic process                                | [3, 4]       | 79        | 1.5110941          | 2.79E-18                                          | [A2M, AHSB, ALB, AMBP, ANG, APOA1, APOA2, APOA4, APOA5, APOB, APOC1, APOC2, APOE, APOH, APOL1, C1QA, C1QB, C1QC, C1R, C3, C4A, C4B, C6, C8B, C9, CDH1, CFB, CFD, CFH, CFHR1, CFHR5, CLU, COLEC11, CPN1, F11, F12, F2, F5, FCN3, FGA, FN1, HP, HPR, HPX, HRG, IGF1, IGF2, IGFBP2, IGFBP3, IGFBP5, IGHA1, IGHG1, IGHG2, IGHG3, IGKC, IGKV4-1, IGLC2, ITIH2, ITIH4, KLKB1, KNG1, KRT1, LBP, LTF, PLG, PON1, PRG4, PROS1, S100A8, S100A9, SERPINA1, SERPINA5, SERPINC1, SERPIND1, SERPINF2, SERPING1, SNCA, THBS1, VTN] |
| GO:0016485 | protein processing                                       | [4, 5]       | 32        | 5.3333335          | 8.46E-19                                          | [A2M, AHSB, AMBP, APOH, C3, C4A, C4B, C6, C8B, C9, CFB, CFH, F11, F12, F2, HRG, ITIH2, ITIH4, KLKB1, KNG1, PROS1, S100A8, S100A9, SERPINA1, SERPINA5, SERPINC1, SERPIND1, SERPINF2, SERPING1, SNCA, THBS1, VTN]                                                                                                                                                                                                                                                                                                     |

| GO ID      | GO Term                                          | GO Levels              | Nr. Genes | % Associated Genes | Term p -Value Corrected with Bonferroni step down | Associated Genes Found                                                                                                                                                                                                                                               |
|------------|--------------------------------------------------|------------------------|-----------|--------------------|---------------------------------------------------|----------------------------------------------------------------------------------------------------------------------------------------------------------------------------------------------------------------------------------------------------------------------|
| GO:0006508 | proteolysis                                      | [4, 5]                 | 39        | 2.5776603          | 1.24E-12                                          | [A2M, AHSG, AMBP, APOE, C1R, C3, C4A, C4B, CDH1, CFB, CFD, CLU, CPN1, F11, F12, F2, F5, FN1, HP, HPR, HRG, ITIH2, ITIH4, KLKB1, KNG1, LTF, PLG, PROS1, S100A8, S100A9, SERPINA1, SERPINA5, SERPINC1, SERPIND1, SERPINF2, SERPING1, SNCA, THBS1, VTN]                 |
| GO:0006898 | receptor-mediated endocytosis                    | [6]                    | 21        | 5.483029           | 1.18E-11                                          | [ALB, AMBP, APOA1, APOA5, APOB, APOC1, APOC2, APOE, APOL1, COLEC11, HBB, HP, HPR, HPX, IGHA1, IGKC, IGKV4-1, IGLC2, PRG4, SNCA, VTN]                                                                                                                                 |
| GO:0031099 | regeneration                                     | [3]                    | 8         | 5.633803           | 1.77E-03                                          | [APOA1, APOA2, APOA4, APOA5, APOE, GSN, IGF1, PLG]                                                                                                                                                                                                                   |
| GO:0002673 | regulation of acute inflammatory response        | [5, 6, 7]              | 14        | 18.421053          | 1.76E-14                                          | [A2M, C3, C4A, C4B, C6, C8B, C9, CFB, CFH, F12, KLKB1, PROS1, SERPING1, VTN]                                                                                                                                                                                         |
| GO:0030193 | regulation of blood coagulation                  | [4, 5, 6, 7]           | 18        | 19.78022           | 9.00E-20                                          | [APOE, APOH, F11, F12, F2, FGA, HRG, KLKB1, KNG1, KRT1, PLG, PROS1, SEPP1, SERPINC1, SERPINF2, SERPING1, THBS1, VTN]                                                                                                                                                 |
| GO:0050878 | regulation of body fluid levels                  | [3]                    | 39        | 5.18617            | 2.39E-23                                          | [A2M, ALB, APOA1, APOB, APOE, APOH, CDH1, CFD, CLU, F11, F12, F2, F5, FGA, FGB, FGG, FN1, HBB, HRG, IGF1, IGF2, KLKB1, KNG1, KRT1, MMRN1, PF4, PLG, PPBP, PROS1, SEPP1, SERPINA1, SERPINA5, SERPINC1, SERPIND1, SERPINF2, SERPING1, TF, THBS1, VTN]                  |
| GO:0050790 | regulation of catalytic activity                 | [3, 4]                 | 39        | 1.9145802          | 1.67E-08                                          | [A2M, AHSG, AMBP, ANG, APOA1, APOA2, APOA4, APOA5, APOC1, APOC2, APOE, APOH, C3, C4A, C4B, CDH1, CLU, FN1, HP, HPR, HRG, IGF2, IGFBP3, ITIH2, ITIH4, KNG1, LTF, PROS1, S100A8, S100A9, SERPINA1, SERPINA5, SERPINC1, SERPIND1, SERPINF2, SERPING1, SNCA, THBS1, VTN] |
| GO:0030155 | regulation of cell adhesion                      | [3, 4]                 | 16        | 2.6229508          | 6.53E-04                                          | [APOA1, CDH1, FGA, FGB, FGG, GSN, HRG, IGF1, IGF2, IGFBP2, KNG1, PLG, SERPINF2, TGFB1, THBS1, VTN]                                                                                                                                                                   |
| GO:0010810 | regulation of cell-substrate adhesion            | [4, 5]                 | 8         | 4.6242776          | 7.46E-03                                          | [APOA1, FGA, FGB, FGG, HRG, PLG, THBS1, VTN]                                                                                                                                                                                                                         |
| GO:0051128 | regulation of cellular component organization    | [2, 3, 4]              | 33        | 1.7142857          | 1.66E-05                                          | [AHSG, APOA1, APOA2, APOA5, APOC1, APOC2, APOE, C3, C4A, C4B, CFH, CLU, F2, FGA, FGB, FGG, FN1, GSN, HRG, IGF1, IGF2, IGFBP2, IGFBP3, IGFBP5, IGFBP7, IGJ, S100A8, S100A9, SEPP1, SERPINF2, SNCA, THBS1, VTN]                                                        |
| GO:0032268 | regulation of cellular protein metabolic process | [4, 5, 6]              | 34        | 1.6707617          | 1.77E-05                                          | [A2M, AHSG, AMBP, ANG, APOA1, APOE, C3, C4A, C4B, CLU, F2, FN1, HPX, HRG, IGF1, IGF2, IGFBP3, IGFBP5, ITIH2, ITIH4, KNG1, LTF, PROS1, S100A8, S100A9, SERPINA1, SERPINA5, SERPINC1, SERPIND1, SERPINF2, SERPING1, SNCA, THBS1, VTN]                                  |
| GO:0032374 | regulation of cholesterol transport              | [6, 7, 8]              | 8         | 20                 | 7.50E-08                                          | [APOA1, APOA2, APOA4, APOA5, APOC1, APOC2, APOE, PON1]                                                                                                                                                                                                               |
| GO:0031347 | regulation of defense response                   | [4, 5]                 | 24        | 4.217926           | 3.97E-11                                          | [A2M, AHSG, APOA1, APOE, C3, C4A, C4B, C6, C8B, C9, CFB, CFH, F12, HPX, KLKB1, KRT1, LBP, LTF, PROS1, S100A8, S100A9, SERPINC1, SERPING1, VTN]                                                                                                                       |
| GO:0030100 | regulation of endocytosis                        | [3, 4, 5, 6]           | 9         | 5                  | 1.13E-03                                          | [AHSG, APOA5, APOC1, APOC2, C3, C4A, C4B, SNCA, VTN]                                                                                                                                                                                                                 |
| GO:0051917 | regulation of fibrinolysis                       | [2, 3, 6, 7, 8, 9, 10] | 9         | 50                 | 3.16E-13                                          | [APOH, F11, F12, F2, HRG, KLKB1, PLG, SERPINF2, THBS1]                                                                                                                                                                                                               |
| GO:0034114 | regulation of heterotypic cell-cell adhesion     | [5, 6]                 | 4         | 25                 | 1.56E-03                                          | [APOA1, FGA, FGB, FGG]                                                                                                                                                                                                                                               |
| GO:0002920 | regulation of humoral immune response            | [4, 5]                 | 13        | 25.490196          | 2.56E-15                                          | [A2M, C3, C4A, C4B, C6, C8B, C9, CFB, CFH, HPX, PROS1, SERPING1, VTN]                                                                                                                                                                                                |

| GO ID      | GO Term                                                             | GO Levels       | Nr. Genes | % Associated Genes | Term p -Value Corrected with Bonferroni step down | Associated Genes Found                                                                                                                                                                                                                                                                                                                                                                                                  |
|------------|---------------------------------------------------------------------|-----------------|-----------|--------------------|---------------------------------------------------|-------------------------------------------------------------------------------------------------------------------------------------------------------------------------------------------------------------------------------------------------------------------------------------------------------------------------------------------------------------------------------------------------------------------------|
| GO:2000295 | regulation of hydrogen peroxide catabolic process                   | [4, 5, 6, 7]    | 3         | 75                 | 6.19E-04                                          | [HP, HPR, SNCA]                                                                                                                                                                                                                                                                                                                                                                                                         |
| GO:0051336 | regulation of hydrolase activity                                    | [4, 5]          | 33        | 3.2195122          | 6.95E-13                                          | [A2M, AHSG, AMBP, ANG, APOA1, APOA2, APOA4, APOA5, APOC1, APOC2, APOH, C3, C4A, C4B, CDH1, FN1, HRG, ITIH2, ITIH4, KNG1, LTF, PROS1, S100A8, S100A9, SERPINA1, SERPINA5, SERPINC1, SERPIND1, SERPINF2, SERPING1, SNCA, THBS1, VTN]                                                                                                                                                                                      |
| GO:0002697 | regulation of immune effector process                               | [3, 4]          | 18        | 5.9016395          | 3.09E-10                                          | [A2M, APOA1, APOA2, C3, C4A, C4B, C6, C8B, C9, CFB, CFH, HPX, LBP, PROS1, S100A8, S100A9, SERPING1, VTN]                                                                                                                                                                                                                                                                                                                |
| GO:0050776 | regulation of immune response                                       | [3, 4]          | 38        | 3.9014373          | 2.98E-18                                          | [A2M, AMBP, APOA1, APOA2, C1QA, C1QB, C1QC, C1R, C3, C4A, C4B, C6, C8B, C9, CDH1, CFB, CFD, CFH, CFHR1, CFHR5, CLU, FCN3, HPX, HRG, IGHG1, IGHG2, IGHG3, IGKC, IGKV4-1, IGLC2, KRT1, LBP, LTF, PROS1, S100A8, S100A9, SERPING1, VTN]                                                                                                                                                                                    |
| GO:0002682 | regulation of immune system process                                 | [2, 3]          | 46        | 3.3117352          | 3.52E-20                                          | [A2M, AMBP, APOA1, APOA2, C1QA, C1QB, C1QC, C1R, C3, C4A, C4B, C6, C8B, C9, CDH1, CFB, CFD, CFH, CFHR1, CFHR5, CLU, FCN3, HPX, HRG, IGF1, IGF2, IGFBP2, IGHG1, IGHG2, IGHG3, IGKC, IGKV4-1, IGLC2, KRT1, LBP, LTF, PF4, PPBP, PROS1, S100A8, S100A9, SEPP1, SERPING1, SNCA, THBS1, VTN]                                                                                                                                 |
| GO:0050727 | regulation of inflammatory response                                 | [4, 5, 6]       | 22        | 8.058608           | 7.60E-16                                          | [A2M, AHSG, APOA1, APOE, C3, C4A, C4B, C6, C8B, C9, CFB, CFH, F12, KLKB1, KRT1, LBP, PROS1, S100A8, S100A9, SERPINC1, SERPING1, VTN]                                                                                                                                                                                                                                                                                    |
| GO:0043567 | regulation of insulin-like growth factor receptor signaling pathway | [4, 5, 6, 8, 9] | 4         | 16.666666          | 8.48E-03                                          | [IGF1, IGFBP2, IGFBP3, IGFBP5]                                                                                                                                                                                                                                                                                                                                                                                          |
| GO:0030300 | regulation of intestinal cholesterol absorption                     | [5, 6, 7, 8, 9] | 4         | 50                 | 6.55E-05                                          | [APOA1, APOA2, APOA4, APOA5]                                                                                                                                                                                                                                                                                                                                                                                            |
| GO:0060191 | regulation of lipase activity                                       | [5, 6]          | 9         | 7.7586207          | 2.80E-05                                          | [ANG, APOA1, APOA2, APOA4, APOA5, APOC1, APOC2, APOH, SNCA]                                                                                                                                                                                                                                                                                                                                                             |
| GO:0046890 | regulation of lipid biosynthetic process                            | [4, 5, 6]       | 10        | 7.874016           | 4.18E-06                                          | [APOA1, APOA4, APOA5, APOB, APOC1, APOC2, APOE, C3, IGF2, IGFBP7]                                                                                                                                                                                                                                                                                                                                                       |
| GO:0050994 | regulation of lipid catabolic process                               | [4, 5, 6]       | 6         | 12.765958          | 2.86E-04                                          | [APOA1, APOA2, APOA4, APOA5, APOC1, APOC2]                                                                                                                                                                                                                                                                                                                                                                              |
| GO:0019216 | regulation of lipid metabolic process                               | [4, 5]          | 12        | 4.2704625          | 1.10E-04                                          | [APOA1, APOA2, APOA4, APOA5, APOB, APOC1, APOC2, APOE, C3, IGF2, IGFBP7, SNCA]                                                                                                                                                                                                                                                                                                                                          |
| GO:0032368 | regulation of lipid transport                                       | [4, 5, 6]       | 11        | 11.458333          | 1.18E-08                                          | [APOA1, APOA2, APOA4, APOA5, APOC1, APOC2, APOE, PON1, S100A8, S100A9, THBS1]                                                                                                                                                                                                                                                                                                                                           |
| GO:0051004 | regulation of lipoprotein lipase activity                           | [6, 7]          | 6         | 40                 | 1.64E-07                                          | [APOA1, APOA4, APOA5, APOC1, APOC2, APOH]                                                                                                                                                                                                                                                                                                                                                                               |
| GO:0032879 | regulation of localization                                          | [2, 3]          | 36        | 1.6981132          | 3.71E-06                                          | [AHSG, ANG, APOA1, APOA2, APOA4, APOA5, APOB, APOC1, APOC2, APOC4, APOE, APOH, C3, C4A, C4B, CDH1, CFH, F2, FGA, FGB, FGG, HRG, IGF1, IGFBP3, IGFBP5, KNG1, LBP, PF4, PON1, PPBP, S100A8, S100A9, SEPP1, SNCA, THBS1, VTN]                                                                                                                                                                                              |
| GO:0019222 | regulation of metabolic process                                     | [2, 3]          | 65        | 1.0110437          | 2.53E-04                                          | [A2M, AHSG, AMBP, ANG, APOA1, APOA2, APOA4, APOA5, APOB, APOC1, APOC2, APOE, APOH, BNC2, C3, C4A, C4B, C6, C8B, C9, CDH1, CFB, CFH, CLU, COLEC11, F12, F2, FCN3, FGA, FGB, FGG, FN1, HBB, HP, HPR, HPX, HRG, IGF1, IGF2, IGFBP3, IGFBP5, IGFBP7, IGHA1, IGF, ITIH2, ITIH4, KLKB1, KNG1, LBP, LTF, PF4, PON1, PRG4, PROS1, S100A8, S100A9, SERPINA1, SERPINA5, SERPINC1, SERPIND1, SERPINF2, SERPING1, SNCA, THBS1, VTN] |

| GO ID      | GO Term                                        | GO Levels    | Nr. Genes | % Associated Genes | Term p -Value Corrected with Bonferroni step down | Associated Genes Found                                                                                                                                                                                                                                                                                                                                                                                           |
|------------|------------------------------------------------|--------------|-----------|--------------------|---------------------------------------------------|------------------------------------------------------------------------------------------------------------------------------------------------------------------------------------------------------------------------------------------------------------------------------------------------------------------------------------------------------------------------------------------------------------------|
| GO:0051239 | regulation of multicellular organismal process | [2, 3]       | 43        | 1.8391788          | 3.50E-09                                          | [AHSG, ALB, APOA1, APOA2, APOA4, APOA5, APOC1, APOC2, APOE, APOH, ASPN, C1QC, C3, C6, CDH1, CLU, F11, F12, F2, FGA, FGB, FGG, FN1, HRG, IGF1, IGFBP5, KLKB1, KNG1, KRT1, LBP, LTF, PF4, PLG, PRG4, PROS1, S100A8, S100A9, SEPP1, SERPINC1, SERPINF2, SERPING1, THBS1, VTN]                                                                                                                                       |
| GO:0052547 | regulation of peptidase activity               | [5, 6, 7]    | 24        | 5.955335           | 1.83E-14                                          | [A2M, AHSG, AMBP, C3, C4A, C4B, CDH1, FN1, HRG, ITIH2, ITIH4, KNG1, PROS1, S100A8, S100A9, SERPINA1, SERPINA5, SERPINC1, SERPIND1, SERPINF2, SERPING1, SNCA, THBS1, VTN]                                                                                                                                                                                                                                         |
| GO:0019220 | regulation of phosphate metabolic process      | [5, 6]       | 26        | 1.7071569          | 8.27E-04                                          | [AHSG, AMBP, ANG, APOA1, APOC1, APOC2, APOE, C3, CLU, F2, FGA, FGB, FGG, HPX, HRG, IGF1, IGF2, IGFBP3, LTF, PF4, S100A8, S100A9, SERPINF2, SNCA, THBS1, VTN]                                                                                                                                                                                                                                                     |
| GO:0042325 | regulation of phosphorylation                  | [6, 7]       | 23        | 1.7597551          | 2.32E-03                                          | [AHSG, AMBP, ANG, APOA1, APOE, C3, CLU, F2, FGA, FGB, FGG, HPX, HRG, IGF1, IGF2, IGFBP3, LTF, S100A8, S100A9, SERPINF2, SNCA, THBS1, VTN]                                                                                                                                                                                                                                                                        |
| GO:0080090 | regulation of primary metabolic process        | [3, 4]       | 57        | 1.0337323          | 1.66E-03                                          | [A2M, AHSG, AMBP, ANG, APOA1, APOA2, APOA4, APOA5, APOB, APOC1, APOC2, APOE, BNC2, C3, C4A, C4B, C6, C8B, C9, CDH1, CFB, CFH, CLU, COLEC11, F12, F2, FCN3, FGA, FN1, HPX, HRG, IGF1, IGF2, IGFBP3, IGFBP5, IGFBP7, ITIH2, ITIH4, KLKB1, KNG1, LBP, LTF, PF4, PON1, PRG4, PROS1, S100A8, S100A9, SERPINA1, SERPINA5, SERPINC1, SERPIND1, SERPINF2, SERPING1, SNCA, THBS1, VTN]                                    |
| GO:2000257 | regulation of protein activation cascade       | [3, 4, 5, 6] | 14        | 38.88889           | 1.22E-19                                          | [A2M, C3, C4A, C4B, C6, C8B, C9, CFB, CFH, FGA, PROS1, SERPINC1, SERPING1, VTN]                                                                                                                                                                                                                                                                                                                                  |
| GO:0051246 | regulation of protein metabolic process        | [4, 5]       | 48        | 2.1323855          | 2.60E-13                                          | [A2M, AHSG, AMBP, ANG, APOA1, APOA2, APOA4, APOE, C3, C4A, C4B, C6, C8B, C9, CDH1, CFB, CFH, CLU, F12, F2, FGA, FN1, HPX, HRG, IGF1, IGF2, IGFBP3, IGFBP5, ITIH2, ITIH4, KLKB1, KNG1, LBP, LTF, PON1, PRG4, PROS1, S100A8, S100A9, SERPINA1, SERPINA5, SERPINC1, SERPIND1, SERPINF2, SERPING1, SNCA, THBS1, VTN]                                                                                                 |
| GO:0070613 | regulation of protein processing               | [5, 6]       | 28        | 7.070707           | 2.48E-19                                          | [A2M, AHSG, AMBP, C3, C4A, C4B, C6, C8B, C9, CFB, CFH, F12, F2, HRG, ITIH2, ITIH4, KLKB1, KNG1, PROS1, SERPINA1, SERPINA5, SERPINC1, SERPIND1, SERPINF2, SERPING1, SNCA, THBS1, VTN]                                                                                                                                                                                                                             |
| GO:0030162 | regulation of proteolysis                      | [5, 6]       | 27        | 3.8243625          | 8.53E-12                                          | [A2M, AHSG, AMBP, APOE, C3, C4A, C4B, CDH1, CLU, F2, FN1, HRG, ITIH2, ITIH4, KNG1, PROS1, S100A8, S100A9, SERPINA1, SERPINA5, SERPINC1, SERPIND1, SERPINF2, SERPING1, SNCA, THBS1, VTN]                                                                                                                                                                                                                          |
| GO:0032101 | regulation of response to external stimulus    | [3, 4]       | 35        | 5.162242           | 1.93E-20                                          | [A2M, AHSG, APOA1, APOE, APOH, C3, C4A, C4B, C6, C8B, C9, CFB, CFH, F11, F12, F2, FGA, HRG, KLKB1, KNG1, KRT1, LBP, LTF, PF4, PLG, PPBP, PROS1, S100A8, S100A9, SEPP1, SERPINC1, SERPINF2, SERPING1, THBS1, VTN]                                                                                                                                                                                                 |
| GO:0048583 | regulation of response to stimulus             | [2, 3]       | 66        | 1.8681008          | 4.50E-18                                          | [A2M, AHSG, ALB, AMBP, APOA1, APOA2, APOE, APOH, ASPN, C1QA, C1QB, C1QC, C1R, C3, C4A, C4B, C6, C8B, C9, CDH1, CFB, CFD, CFH, CFHR1, CFHR5, CLU, F11, F12, F2, FCN3, FGA, FGB, FGG, HP, HPR, HPX, HRG, IGF1, IGF2, IGFBP2, IGFBP3, IGFBP5, IGHG1, IGHG2, IGHG3, IGKC, IGKV4-1, IGLC2, KLKB1, KNG1, KRT1, LBP, LTF, PF4, PLG, PPBP, PROS1, S100A8, S100A9, SEPP1, SERPINC1, SERPINF2, SERPING1, SNCA, THBS1, VTN] |
| GO:0080134 | regulation of response to stress               | [3, 4]       | 39        | 3.5198555          | 2.90E-17                                          | [A2M, AHSG, AMBP, APOA1, APOE, APOH, C3, C4A, C4B, C6, C8B, C9, CFB, CFH, CLU, F11, F12, F2, FGA, HP, HPR, HPX, HRG, KLKB1, KNG1, KRT1, LBP, LTF, PLG, PROS1, S100A8, S100A9, SEPP1, SERPINC1, SERPINF2, SERPING1, SNCA, THBS1, VTN]                                                                                                                                                                             |
| GO:1903034 | regulation of response to wounding             | [4, 5]       | 32        | 8.205129           | 1.36E-24                                          | [A2M, AHSG, APOA1, APOE, APOH, C3, C4A, C4B, C6, C8B, C9, CFB, CFH, F11, F12, F2, FGA, HRG, KLKB1, KNG1, KRT1, LBP, PLG, PROS1, S100A8, S100A9, SEPP1, SERPINC1, SERPINF2, SERPING1, THBS1, VTN]                                                                                                                                                                                                                 |
| GO:0019218 | regulation of steroid metabolic process        | [5, 6]       | 9         | 10.4651165         | 2.01E-06                                          | [APOA1, APOA2, APOA4, APOA5, APOB, APOC1, APOE, IGF2, IGFBP7]                                                                                                                                                                                                                                                                                                                                                    |
| GO:0051049 | regulation of transport                        | [3, 4]       | 26        | 1.642451           | 1.67E-03                                          | [AHSG, ANG, APOA1, APOA2, APOA4, APOA5, APOC1, APOC2, APOE, C3, C4A, C4B, CDH1, CFH, F2, FGA, FGB, FGG, IGF1, KNG1, PON1, S100A8, S100A9, SNCA, THBS1, VTN]                                                                                                                                                                                                                                                      |

| GO ID      | GO Term                                                        | GO Levels          | Nr. Genes | % Associated Genes | Term p -Value Corrected with Bonferroni step down | Associated Genes Found                                                                                                                                                                                                                                                                                                                                                                    |
|------------|----------------------------------------------------------------|--------------------|-----------|--------------------|---------------------------------------------------|-------------------------------------------------------------------------------------------------------------------------------------------------------------------------------------------------------------------------------------------------------------------------------------------------------------------------------------------------------------------------------------------|
| GO:0090207 | regulation of triglyceride metabolic process                   | [4, 5, 6, 7, 8]    | 5         | 17.857143          | 4.84E-04                                          | [APOA1, APOA4, APOA5, APOC2, C3]                                                                                                                                                                                                                                                                                                                                                          |
| GO:0010901 | regulation of very-low-density lipoprotein particle remodeling | [3, 4, 5, 6, 7, 9] | 4         | 66.666664          | 1.44E-05                                          | [APOA1, APOA2, APOA5, APOC2]                                                                                                                                                                                                                                                                                                                                                              |
| GO:0060627 | regulation of vesicle-mediated transport                       | [3, 4, 5]          | 12        | 3.269755           | 1.77E-03                                          | [AHSG, APOA5, APOC1, APOC2, C3, C4A, C4B, FGA, FGB, FGG, SNCA, VTN]                                                                                                                                                                                                                                                                                                                       |
| GO:0009617 | response to bacterium                                          | [3, 5]             | 13        | 2.8017242          | 3.55E-03                                          | [APOB, HP, HPR, IGHM, LBP, LTF, PF4, PPBP, S100A8, S100A9, SEPP1, SERPINA1, SNCA]                                                                                                                                                                                                                                                                                                         |
| GO:0010035 | response to inorganic substance                                | [3]                | 19        | 4.328018           | 1.50E-08                                          | [ALB, APOA4, APOB, CDH1, FGA, FGB, FGG, GSN, HBB, HP, HPR, HRG, IGFBP2, PON1, S100A8, S100A9, SERPINA1, SNCA, THBS1]                                                                                                                                                                                                                                                                      |
| GO:0033993 | response to lipid                                              | [4]                | 19        | 2.4265645          | 1.86E-04                                          | [APOA1, APOA2, APOB, APOE, CPN1, IGF2, IGFBP2, IGFBP7, LBP, LTF, PF4, PON1, PPBP, S100A8, S100A9, SEPP1, SERPINA1, SNCA, THBS1]                                                                                                                                                                                                                                                           |
| GO:0032496 | response to lipopolysaccharide                                 | [4, 5, 7]          | 10        | 3.4722223          | 7.34E-03                                          | [APOB, LBP, LTF, PF4, PPBP, S100A8, S100A9, SEPP1, SERPINA1, SNCA]                                                                                                                                                                                                                                                                                                                        |
| GO:0010038 | response to metal ion                                          | [4]                | 13        | 4.3333335          | 2.76E-05                                          | [ALB, CDH1, FGA, FGB, FGG, GSN, HRG, IGFBP2, S100A8, S100A9, SERPINA1, SNCA, THBS1]                                                                                                                                                                                                                                                                                                       |
| GO:0010033 | response to organic substance                                  | [3]                | 36        | 1.375621           | 7.79E-04                                          | [AHSG, ALB, ANG, APOA1, APOA2, APOA4, APOA5, APOB, APOE, ASPN, CDH1, CLU, CPN1, F12, FGB, GSN, HPX, HRG, IGF2, IGFBP2, IGFBP5, IGFBP7, ITIH4, LBP, LTF, PF4, PON1, PPBP, S100A8, S100A9, SEPP1, SERPINA1, SERPINF2, SNCA, THBS1, VTN]                                                                                                                                                     |
| GO:1901700 | response to oxygen-containing compound                         | [3]                | 26        | 1.8531718          | 1.76E-04                                          | [AHSG, APOA2, APOA4, APOB, APOE, CDH1, CLU, GSN, HBB, HP, HPR, IGF2, IGFBP2, IGFBP5, IGFBP7, LBP, LTF, PF4, PON1, PPBP, S100A8, S100A9, SEPP1, SERPINA1, SNCA, THBS1]                                                                                                                                                                                                                     |
| GO:0009611 | response to wounding                                           | [3]                | 52        | 4.92891            | 3.97E-32                                          | [A2M, AHSG, ALB, APOA1, APOA5, APOB, APOE, APOH, C3, C4A, C4B, C6, C8B, C9, CFB, CFD, CFH, CLU, F11, F12, F2, F5, FGA, FGB, FGG, FN1, GSN, HBB, HRG, IGF1, IGF2, KLKB1, KNG1, KRT1, LBP, MMRN1, PF4, PLG, PPBP, PROS1, S100A8, S100A9, SEPP1, SERPINA1, SERPINA5, SERPING1, SERPIND1, SERPINF2, SERPING1, TF, THBS1, VTN]                                                                 |
| GO:0001523 | retinoid metabolic process                                     | [7, 8]             | 7         | 7.7777777          | 9.12E-04                                          | [APOA1, APOA2, APOA4, APOB, APOC2, APOE, TTR]                                                                                                                                                                                                                                                                                                                                             |
| GO:0043691 | reverse cholesterol transport                                  | [6, 7, 8]          | 7         | 36.842106          | 9.60E-09                                          | [APOA1, APOA2, APOA4, APOA5, APOC2, APOE, CLU]                                                                                                                                                                                                                                                                                                                                            |
| GO:0032940 | secretion by cell                                              | [3, 4, 5, 6]       | 30        | 3.1847134          | 2.63E-11                                          | [A2M, ALB, ANG, APOA1, APOA2, CFD, CLU, F5, FGA, FGB, FGG, FN1, HRG, IGF1, IGF2, KNG1, MMRN1, PF4, PLG, PPBP, PROS1, S100A8, S100A9, SEPP1, SERPINA1, SERPINF2, SERPING1, SNCA, TF, THBS1]                                                                                                                                                                                                |
| GO:0044765 | single-organism transport                                      | [2, 3, 4]          | 61        | 1.5741936          | 3.45E-12                                          | [A2M, AHSG, ALB, ANG, APOA1, APOA2, APOA4, APOA5, APOB, APOC1, APOC2, APOC4, APOE, APOH, APOL1, C3, C4A, C4B, CDH1, CFD, CFH, CLU, F2, F5, FCN3, FGA, FGB, FGG, FN1, HBA2, HBB, HPX, HRG, IGF1, IGF2, IGHG1, IGHG2, IGHG3, IGKC, IGKV4-1, IGLC2, KNG1, LBP, LTF, MMRN1, PF4, PLG, PON1, PPBP, PROS1, S100A8, S100A9, SEPP1, SERPINA1, SERPINA5, SERPINF2, SERPING1, SNCA, TF, THBS1, TTR] |
| GO:0008202 | steroid metabolic process                                      | [4]                | 11        | 3.6065574          | 1.85E-03                                          | [ALB, APOA1, APOA2, APOA4, APOA5, APOB, APOC1, APOE, APOL1, IGF2, IGFBP7]                                                                                                                                                                                                                                                                                                                 |



| GO ID      | GO Term                                          | GO Levels    | Nr. Genes | % Associated Genes | Term p -Value Corrected with Bonferroni step down | Associated Genes Found                                                                                                                                                                                                                                                                                                                                                                                                                   |
|------------|--------------------------------------------------|--------------|-----------|--------------------|---------------------------------------------------|------------------------------------------------------------------------------------------------------------------------------------------------------------------------------------------------------------------------------------------------------------------------------------------------------------------------------------------------------------------------------------------------------------------------------------------|
| GO:0006810 | transport                                        | [3]          | 69        | 1.498046           | 7.20E-14                                          | [A2M, AHSG, ALB, AMBP, ANG, APOA1, APOA2, APOA4, APOA5, APOB, APOC1, APOC2, APOC4, APOE, APOH, APOL1, C3, C4A, C4B, CDH1, CFD, CFH, CLU, COLEC11, F2, F5, FCN3, FGA, FGB, FGG, FN1, GSN, HBA2, HBB, HP, HPR, HPX, HRG, IGF1, IGF2, IGHA1, IGHG1, IGHG2, IGHG3, IGKC, IGKV4-1, IGLC2, KNG1, LBP, LTF, MMRN1, PF4, PLG, PON1, PPBP, PRG4, PROS1, S100A8, S100A9, SEPP1, SERPINA1, SERPINA5, SERPINF2, SERPING1, SNCA, TF, THBS1, TTR, VTN] |
| GO:0070328 | triglyceride homeostasis                         | [7]          | 5         | 14.285714          | 1.51E-03                                          | [APOA1, APOA4, APOA5, APOC2, APOC4]                                                                                                                                                                                                                                                                                                                                                                                                      |
| GO:0001944 | vasculature development                          | [4, 5, 6, 7] | 16        | 2.6272578          | 6.40E-04                                          | [ANG, APOB, APOE, APOH, C3, C6, FN1, HRG, IGF1, KLKB1, KRT1, PF4, PLG, SERPINF2, TGFBI, THBS1]                                                                                                                                                                                                                                                                                                                                           |
| GO:0034447 | very-low-density lipoprotein particle clearance  | [4, 5]       | 3         | 50                 | 2.95E-03                                          | [APOC1, APOC2, APOE]                                                                                                                                                                                                                                                                                                                                                                                                                     |
| GO:0034372 | very-low-density lipoprotein particle remodeling | [5, 6, 8]    | 6         | 46.153847          | 5.71E-08                                          | [APOA1, APOA2, APOA4, APOA5, APOC2, APOE]                                                                                                                                                                                                                                                                                                                                                                                                |
| GO:0016192 | vesicle-mediated transport                       | [4]          | 54        | 3.69863            | 2.53E-27                                          | [A2M, AHSG, ALB, AMBP, APOA1, APOA5, APOB, APOC1, APOC2, APOE, APOL1, C3, C4A, C4B, CFD, CLU, COLEC11, F5, FCN3, FGA, FGB, FGG, FN1, GSN, HBB, HP, HPR, HPX, HRG, IGF1, IGF2, IGHA1, IGHG1, IGHG2, IGHG3, IGKC, IGKV4-1, IGLC2, KNG1, LBP, MMRN1, PF4, PLG, PPBP, PRG4, PROS1, SEPP1, SERPINA1, SERPINF2, SERPING1, SNCA, TF, THBS1, VTN]                                                                                                |
| GO:0042060 | wound healing                                    | [4]          | 41        | 5.5330634          | 6.65E-26                                          | [A2M, ALB, APOA1, APOA5, APOB, APOE, APOH, CFD, CLU, F11, F12, F2, F5, FGA, FGB, FGG, FN1, GSN, HBB, HRG, IGF1, IGF2, KLKB1, KNG1, KRT1, MMRN1, PF4, PLG, PPBP, PROS1, S100A8, SEPP1, SERPINA1, SERPINA5, SERPINC1, SERPIND1, SERPINF2, SERPING1, TF, THBS1, VTN]                                                                                                                                                                        |
| GO:0031638 | zymogen activation                               | [5, 6]       | 9         | 7.2580647          | 4.99E-05                                          | [APOH, F11, F12, KLKB1, S100A8, S100A9, SERPINF2, SNCA, THBS1]                                                                                                                                                                                                                                                                                                                                                                           |
